# Supplementary material for: Growth dynamics in Acropora cervicornis and A. prolifera in southwest Puerto Rico
Source: PeerJ. 2020 Feb 11;8:e8435. doi: 10.7717/peerj.8435 (PMC7020822; doi:10.7717/peerj.8435)
Supplement: Data S1 [file peerj-08-8435-s002.xlsx]

## Sheet: San Cristobal-growth
Acropora cervicornis linear extension
			Trip 1	Trip 1	Trip 1	Trip 2	Trip 2	Trip 2	Trip 3	Trip 3	Trip 3	Trip 4	Trip 4	Trip 4	Trip 5	Trip 5	Trip 5	Trip 6	Trip 6	Trip 6	Trip 7	Trip 7	Trip 7	Trip 8	Trip 8	Trip 8	Trip 9	Trip 9	Trip 9	Trip 10	Trip 10	Trip 10	Trip 11	Trip 11	Trip 11	Trip 12	Trip 12	Trip 12
			2015-09-04	2015-09-04	2015-09-04	2015-09-22	2015-09-22	2015-09-22	2015-10-13	2015-10-13	2015-10-13	2015-11-03	2015-11-03	2015-11-03	2015-11-19	2015-11-19	2015-11-19	2015-12-10	2015-12-10	2015-12-10	2016-02-01	2016-02-01	2016-02-01	2016-03-16	2016-03-16	2016-03-16	2016-04-26	2016-04-26	2016-04-26	2016-06-08	2016-06-08	2016-06-08	2016-07-21	2016-07-21	2016-07-21	2016-08-29	2016-08-29	2016-08-29
Overall	Location	Colony	Measurements (cm)	notes	AVERAGE	Measurements (cm)	notes	AVERAGE	Measurements (cm)	notes	AVERAGE	Measurements (cm)	notes	AVERAGE	Measurements (cm)	notes	AVERAGE	Measurements (cm)	notes	AVERAGE	Measurements (cm)	notes	AVERAGE	Measurements (cm)	notes	Average	Measurements (cm)	notes	Average	Measurements (cm)	notes	Average	Measurements (cm)	notes	Average	Measurements (cm)	notes	Average
1	San Cristobal	595 thin	4.1	thin= prolifera		10.2	multiple branching (8.2+2)		8.2			9.7	multiple branches (8.2 +1.5)		11.4	multiple branches (9.2+ 2.2)		12.7	multple branches (10+2.7)		21	multiple branches (12+2.5+4+2.5)		10.8			15.7	multiple branches (12.2+3.5)		41.6	multiple branches (16.6+5 X 5)		30	multiple branches (16+7+7)		26	22+4
		595 thin	8.5			4.2			9.6	multiple branches (7.2+ 2.4)		8.4			10	multiple bracnhes (9+1)		8.5	multiple branches (7.5+1)		19	multiple branches (12+4.5+2.5)		9.5			20.5	multiple branches (13+7.5)		28.5	multiple branches (5 X 3)		27	multiple branches (10+9+8)		26
		595 thin	6.5			10.2			10.8	multiple branches (8.8 + 2)		9.1	multiple branches (6.6 +2.5)		14.2	multiple bracnhes (10.5+1.5+2.2)		6.8			11.2	multiple branches (9+2.2)		14.4	multiple branches (12.2+2.2)		10.7	multiple branches (7.7+3)		20.2	fuse		17.5	broken		27	17+5+5
		595 thin	7.2			9.2			7.9			11.7	multiple branches (9.5 + 2.2)		6.2			10.4	multiple branches (8.2+2.2)		14	multiple branches (11+1.5+1.5)		17.5	multiple branches (12.5+5)		29	multiple branches (15+4+4+3+3)		16.5	multiple branches (11.5+5)		22.3			17	15+2
		595 thin	8.9		7.04	8	multiple branching (6.2+1.8)	8.36	5.7		8.44	5.9		8.96	9	multiple branches (7.5+1.5)	10.16	15.5	multiple branches (10.7+3.2+1.6)	10.78	7.8		14.6	22.2	multiple branches (14.2+4+4)	14.88	11.1		17.4	20.5		25.46	27.5	multiple branches (16.5+11)	24.86	NA		24
		595 thick	7.8	thick= cervicornis		10.8			11.2			11.5			9.5	broken tip		16.2			11.5			10.2			10			9.2	broke		21	multiple branches (17+4)		10	broken
		595 thick	11.1			7.8			9.1			13.5			12.5			9.5			18			13.2			21.9			18.2	multiple branches (16.2+2)		10.1	broken		22.6
		595 thick	10.1			11.4			10.4			9.1			11.6			12.2			15.5	multiple branches (14.5+1)		15.9			17.7			19.6			21.5			26
		595 thick	10.3			11.8			12.6			9.1			7.5			9.2	broken		10.8	broken tip		18.4			15.2			23.5			25.2			21.5	19.5+2
		595 thick	12.2		10.3	10.2		10.4	8.9		10.44	12.5		11.14	14.5		11.12	13.1		12.04	14.3		14.02	16.5	multiple branches (15.5+1)	14.84	18.1		16.58	20.2	multiple branches (18.2+2)	18.14	21.5	multiple branches (19.5+2)	19.86	29	17+7+5	21.82
2	San Cristobal	594 thin	3.1			6.8			9.3	multiple branches (7.8 + 1.5)		5.8			10.8	multiple bracnhes (7.2+3.5)		4.2			3.2			14.5	multiple branches (9.5+2+3)		3.3	broken		3.5	broke		9.5			20.5	14.5+6
		594 thin	5.5			4.4			7.8			6.8			3.8			11.2	multiple branches (9.2+2)		13.8	multiple branches (9.1+3+1.7)		9.8			7.8			17.5	multiple branches (9.5+5+3)		26			NA
		594 thin	6.2			7.2			4			9.7	multiple branches (6.5 + 3.2)		8.2			6.2			18.1	multiple branches (12.5+2.6+3)		10.2			20.9	multiple branches (14.5+6.4)		25	multiple branches (15+7.5+3)		3.6	broken		10.5	5.5+5
		594 thin	6.4			3.4			9.6	multiple branches (6.3 + 2.2 + 1.1)		8.6			5.9			5.5			7.5			3.5	broken		16	multiple branches (9.5+4.5+2)		8.5	broke		NA			22.2	18+4.2
		594 thin	5.5		5.34	8.2	multiple branching (6+2.2)	6	7.5		7.64	7.5		7.68	15.7	multiple branches (8.5+3.2+4)	8.88	17.2		8.86	6.8		9.88	24.5	multiple branches (14.5+2+2+3+3)	12.5	11.9		11.98	9.2		12.74	19.2	multiple branches (16.2+3)	14.575	3.8	broken	14.25
		594 thick	5.2			8			5.8			6.1			6.4			8	multiple branches (6.5+ 1.5)		9.5			17.1			17.5			27.7	multiple branches (15.7+5.5+6.5)		10.5	multiple branches (3.5+7)		30.3	20.2+10
		594 thick	4.4			6.2			7.4			6.2			7.2			7.2			9.4			11.5			13.2			18.7	multiple branches (14.2+4.5)		16.7			29.5	19.5+10
		594 thick	8.2			7.2			5.7			7.2			7.5			7.2			11.6			10.6			14.9			21.2	multiple branches (15.7+5.5)		30	multiple branches (21+7+2)		22.5	16.5+6 OG
		594 thick	6.2			5			6.8			6.2			7.7			11.5			10.2			14.3	multiple branches (12.3+2)		14.1	multiple branches (13.1+1)		26.5	multiple branches (19.5+7)		31	multiple branches (16+9+6)		NA
		594 thick	5.9		5.98	5		6.28	8		6.74	8.5		6.84	10.5		7.86	10.5		8.88	6.2		9.38	19.1	multiple branches (16.6+2.5)	14.52	18.7	multiple branches (14.2+4.5)	15.68	15.3		21.88	30.5	multiple branches (21.5+9)	23.74	18.3		25.15
3	San Cristobal	593 thin	4.9			5.2			9	multiple branches (7.2 + 1.8)		5.7			5.9			6.2			9.6			9.8			15.2	multiple branches (11.1+2+2)		21.5	multiple branches (16.5+5)		27.2	(20+7.2)		17.5
		593 thin	5.6			7.2			5.2			8.2			8.2			8.2			10.2			14.1	multiple branches (12.1+2)		18.1	multiple branches (14.5+3.6)		24.2	multiple branches (12.2+6+6)		15.4	dead		28	12+8+8
		593 thin	6.3			5.2			6.2			7			8.8	multiple branches (6.2+2.6)		8.7	multiple branches (7.2+1.5)		8.9			14.5	multiple branches (10.5+1+1+2)		13.5	multiple branches (10.2+3.3)		10.7	multiple branches (5.7+5)		19.5	epithized (14.5+5)		20.5	15.5+5
		593 thin	5.2			7.2			6.4			8.5	multiple branches (6 +2.5)		8.9			7.5			9.7	multiple branches (8.5+1.2)		13.2	multiple branches (10.2+1+2)		22.9	multiple branches (11.9+5.5+5.5)		NA			24.2			NA
		593 thin	5.2		5.44	7	multiple branching (6+1)	6.36	6.5		6.66	6.2		7.12	7.2		7.8	9.2		7.96	9.2		9.52	17.5	multiple branches (10.5+3+3+1)	13.82	10.8	epithized	16.1	21.5	multiple branches (14.5+5+2)	19.475	NA		21.575	24.4	16.7+7	22.6
		593 thick	8.1			8.2			6.6			9.2			7.2			10.8			11.2			11.5	epithized		16.2			17.9	epithized		13.2	epithized		15.5
		593 thick	8.4			8.2			8.3			7.2			11.5			7.2			8.4			14.7			11.2	epithized		13.4	epithized		7.1	dead		NA	epithized and dead
		593 thick	6.2			6.8			11.4			8.6			9.2			7.2			11.7			9.2	?		9.7	epithized		13.9			13.2	epithized		NA	epithized and dead
		593 thick	7.5			10.4			7.7			9.9			9.8			11.1			12.2			18.2	multiple branches (15.1+3.1)		15.2			9.9	epithized		19.5	epithized		NA	epithized and dead
		593 thick	7.9		7.62	8.4		8.4	9.8		8.76	10.5		9.08	9.8	epithized	9.5	11.8		9.62	14.9	multiple branches (13.2+1.7)	11.68	5.9	epithized	11.9	20.2	multiple branches (15.7+4.5)	14.5	9.9		13	NA		13.25	NA	epithized and dead	15.5
4	San Cristobal	592 thin	3			3.4			6.4	multiple branches (5.1 + 1.3)		6.8	multiple branches (5.6 + 1.2)		4.6			7.4			7.7			9.1			10.2			15.8	multiple branches (11.2+4.6)		13.5	(11.5+2)		6.5	broken
		592 thin	3.1			4.8			4.2			4.5			7.4	multiple branches (6.4+1)		4.5			6.8			7.3			13.5	multiple branches (9.5+4)		12.2	multiple branches (10+2.2)		6.2	broken		19.5	14.5+5
		592 thin	4.2			5.6	multiple branching (4.2+1.4)		3.7			4.7			4.2			4.5			6.1			7.5			7.8			4.5	broke		22.1	(15.1+7)		20.5	13.5+3+4
		592 thin	6.9			6.4			5.6			7.7			7.2			9.5			8.9			10.5			7.5	broken		22.2	multiple branches (11.2+4+5+2)		26.3	(13.3+5+5+3)		19.5	14.5+5+5
		592 thin	4.2		4.28	4.2		4.88	8		5.58	6.2		5.98	6.5		5.98	9		6.98	9	broken tip	7.7	10.5	multiple branches (8.5+2)	8.98	15.2	multiple branches (11.2+2+2)	10.84	18.2	multiple branches (12.2+3+3)	14.58	16.2		16.86	18.2		16.84
		592 thick	8.2			13.6			10.6			13.7			15.2	multiple branches (14.2+1)		15.2			8.7			25.5	multiple branches (21+4.5)		13.5			25.6			22	broken		40.5	21+19.5
		592 thick	12.4			10.2			15.2			15.1			14.5			9.7	broken	1.38	17.8	multiple branches (14.2+1.6+1+1)		11.2			12.5			27.9	multiple branches (23.9+2+2)		34	(23.5+10.5)		40	25+15
		592 thick	13.2			13.8			11.4	broke		11.8			12.3			13.4			25.5	multiple branches (17.5+4+2+2)		10.9			29.7	multiple branches (22.5+7.2)		33.2	multiple branches (24.2+9)		22.5	epithized		26	23+3
		592 thick	9.8			8.6			14.4			14.8			15.5			15.5			20.8	multiple branches (19.2+1.6)		29.8	multiple branches (16.8+3+3+3+2+2)		36.5	multiple branches (18.5+5+6+3+3+2)		37.2	multiple branches (18.2+8+9+2)		29.4	(15.4+5+5+4)		NA
		592 thick	7.2		10.16	10.8		11.4	5.5		11.42	9.8		13.04	14.6		14.42	11.4		13.04	20.6	multiple branches (16.6+2+2)	18.68	30.5	multiple branches (19.5+4+4+3+5+2+3)	21.58	40.5	multiple branches (21.5+5+5+5+5)	26.54	18.2		28.42	39.9	(26+6+4+3.9)	29.56	22	16+6	32.125
5	San Cristobal	591 thin	8.4			4.4			4.6			5.7			9.8			5.5			6.6			9.5			10.2			16.2	multiple branches (10.2+2+2+2)		15.6	(11.6+2+2)		21.5	13.5+4+4
		591 thin	3.2			3.8			4.6			5.6			5.5			10.5			11.2			7.8			10.9	multiple branches (8.9+2)		14	multiple branches (8+3+3)		18.7	(12.4+6.3)		19	13+3+3
		591 thin	4.2			3.6			5.8			4.7			4.5			5.5			11.4	multiple branches (8.2+3.1)		11.5	multiple branches (7.5+2+2)		9.5	broken		7.5			7.2	broken		7.9	broken
		591 thin	3.9			9.8			6.1			9.5			6.2			4.6			12.7	multiple branches (8.2+2.5+2)		14.2	multiple branches (9.2+3+2)		11.6	multiple branches (7.6+2+2)		23.5	multiple branches (15.5+4+4)		20.6	(15.6+5)		21	13+4+4
		591 thin	5.2		4.98	6.2		5.56	9.8		6.18	5.8		6.26	6.2		6.44	6.2		6.46	16.5	multiple branches (7+2+2+2+2+1.5)	11.68	19.1	multiple branches (13.1+3+3)	12.42	21.2	multiple branches (15.2+3+3)	12.68	19	multiple branches (10+4+5)	16.04	23.2	broken	17.06	17.2	15+2.2	17.32
		591 thick	2.2			7	multiple branching (5.2+1.8)		3.6			7.6	multiple branches (4.6 + 3)		5.2			10.7	multiple branches (6.6+4.3)		7.7			9.2			11.5			12.5			NA			NA
		591 thick	5.2			3.2			5.6			9.6			10.7	multiple branches (6.7+4)		9.2	multiple branches (8.2+1)		11.8	multiple branches (9.8+2)		11.9			12.2			16.5	multiple branches (14.5+2)		18.9	(14.5+4.4)		20	15+5
		591 thick	4.2			5.4			9.5	multiple branches (6.3 + 3.2)		5.2			10.6			5.9			7.6			9.2			15.1			28	multiple branches (14+7+7)		32	(16.1+14+1.9)		37	20+17
		591 thick	7.4			7.6			4.5			6.2			5.8			11.6			20.2	multiple branches (10.2+5+3+2)		21.6	multiple branches (11.1+6.5+4)		9.5			35.5	multiple branches (19.5+8+8)		19.3			23.5	15.5+8
		591 thick	2.4		4.28	2.8		5.2	9.2		6.48	10.1		7.74	7.2		7.9	6.2		8.72	13.8	multiple branches (6.4+3.8+3.6)	12.22	18.1	multiple branches (10.1+4+4)	14	30.5	multiple branches (17.5+7+6)	15.76	17.5	multiple branches (12.5+5)	22	27.4	epithized	24.4	26.2	epithized and dead	26.675
6	San Cristobal	590 thin	4.2			4.2			0.5	broke		3.4			10.5	multiple bracnhes (9.5+1)		12.2	multiple branches (10.2+!+!)		12.8			7.2			5			7.5			8.5			NA
		590 thin	3.2			4			8.5			9.5			5.4			8	broken		10.4	broken tip		8.1			4.9	broken		6.5			26.7			27.3
		590 thin	3.1			3.4			5.2	epithized		6.5	epithized		9.5			4.8			5.6			NA	missing branch		7.9			5.2			NA			5.6
		590 thin	6.9			8.2			5.2	epithized		9.1			7.8			3.2	broken		NA	missing branch		NA	missing branch		NA	missing branch		25.6			6.1	epithized		14.5
		590 thin	3.3		4.14	3.4		4.64	NA		4.85	7.2		7.14	3.9		7.42	3.2	broken	6.28	NA	missing branch	9.6	15.2	multiple branches (12.3+2.9)	10.1667	23.5	multiple branches (19.5+4)	10.325	NA		11.2	5.8		11.775	9.5		14.225
		590 thick	3.3			4.2			4.8			10.8	multiple branches (9.6 + 1.2)		6.2			6.2			7.6			7.2	epithized		11.2			20.2			NA			NA
		590 thick	3.2			3.8			11.5	multiple branches (8.7 + 2.8)	0.21	5.7			15.2	multiple bracnhes (10.2+5)		17.5	multiple branches (11.5+6)		19.2	multiple branches (12.2+7)		9.8			10.5	multiple branches (7.5+3)		NA			39.5	(19.5+11+9)		30.5	25+5.5
		590 thick	5.4			11	multiple branching (9.2+1.8)		4.4			4.2			4.5	broken tip		4.6	broken		7.2			10.5			NA	missing branch		21	multiple branches (13+4+4)		10.1	broken		9.5	broken
		590 thick	2.4			3.4			3.5			4.6			4.8			6.2			5.5			15.2			16.5	multiple branches (12.5+2+2)		25.5	multiple branches (15.5+5+5)		27.7	(21.2+2+4.5)		21	16+5
		590 thick	3.4		3.54	3.4		5.16	4.8		5.8	8.6		6.78	3.5	broken tip	6.84	7.8	multiple branches (6.8+1)	8.46	7.8		9.46	23.5	multiple branches (18+2+3.5)	13.24	23.2	multiple branches (15.2+5+3)	15.35	34.5	multiple branches (19.5+10+5)	25.3	21.9		24.8	41.3	25+10+6.3	25.575
7	San Cristobal	589 thin	2.3			3.4			6.2			7.2			6	multiple bracnhes (4+1+1)		7.2			8.6			9.5			11.5			10.5			NA			NA
		589 thin	7.1			2.8			3.8			4.6			6.2			8.5	multiple branches (6.3+2.2)		7.5			10.9			11.2			20.5	multiple branches (15.5+5)		NA			11.5
		589 thin	2.2			5.6			4.2			7.8			4.9			7.5			8.9			8.7			13.2	multiple branches (10.2+3)		NA			11.2			19.5
		589 thin	2.4			6.4			6.8			5.6	broken		5.6			7.3			10.1			7.9			NA	missing branch		NA			21.2	(15.5+5.7)		22	15+7
		589 thin	5.1		3.82	2.8		4.2	8.3		5.86	4.5		5.94	8		6.14	7.5	multiple branches (4.5+1.5+!.5)	7.6	12.7	multiple branches (7+3.2+2.5)	9.56	4.5	broken	8.3	NA	missing branch	11.9667	19.6	multiple branches (16.6+3)	16.8667	20.6	(17.2+3.4)	17.6667	23.5	16.5+7	19.125
		589 thick	7.2			8.2			9.5			5.5			5.1	multiple branches (2.6+2.5) broke		13.8	epithized		12.3	epithized		10.2			12.5			15.5			16.7			11.9	9+2.9
		589 thick	5.9			3.8			4.8			4.4			5.7	epithized		11.6			11.2	broken		7.8	epithized		12.5	epithized		18.5	multiple branches (14.5+4)		21.2	epithized		NA
		589 thick	4.1			4.2			4.7			7.1			10.5			8.2			11.1			11.9			15.7	multilpe branches (11.2+4.5)		16.5	epithized		22.5	(17.5+5)		19.5	17+2.5
		589 thick	3.1			4.8	broken tip		4.1	multiple branches (2.5 + 1.6)		5.8			7.5			13.7	muliple branches (10.5+3.2) epi		10.5			10.2	epithized		22.5	multiple branches (20.5+2)		NA			NA			25.5	20+5.5
		589 thick	3.9		4.84	3.4		4.88	4.2		5.46	4.7	multiple branches (3.2 + 1.5)	5.5	6.7		7.1	6.1		10.68	7.2	broken multiple branches (2.2+3)	10.46	18.5	multiple branches (14.5+2+2)	11.72	9.8	epithized	14.6	14.7	multiple epi branches (11.1+3.5)	16.3	15.3	epi (11.3+4)	18.925	17.5		18.6
8	San Cristobal	588 thin	3.2			3.8			3.6			4.2			4.5	multiple bracnhes (2+2.5)		5.7			10.2	multiple branches (7.2+1.5+1.5)		11.8	multiple branches (9.8+1+1)		7.5	broken		8.9			14	(7+7)		NA
		588 thin	4.8			5			3.7	multiple branches (2.2 + 1.5)		5.2			4.6			6.2			8.2			3.2	broken		9.9	multiple branches (4.9+2+3)		13	multiple branches (6+7)		NA			17	10+7
		588 thin	4.9			4.4			5.5			5.7			14.7	multiple bracnhes (7.2+5.5+2)		5.9			7.2			17.5	multiple branches (11.5+3+3)		19.2	multiple branches (13.2+3+3)		12.2	multiple branches (10+2.2)		29.5	(14.5+5+5+5)		25	15+5+5
		588 thin	2.2			2			4.2			4	multiple branches (1.8 + 2.2) Broken		5.8			15.8	multiple branches (12+3.8)		7.6			19.5	multiple branches (11.5+3+3+2)		8.7	broken		20.5	multiple branches (13.5+3+4)		24.5	(14.5+6+4)		30.5	15+10+5.5
		588 thin	2.8		3.58	3.2		3.68	4.8		4.36	3.5		4.52	5.2		6.96	6.5		8.02	8	multiple branches (6.5+1.5)	8.24	23.1	multiple branches (11.1+2+2+2+2+2+2)	15.02	30.2	multiple branches (13.2+7+5+5)	15.1	32.2	multiple branches (12.2+5 X 4)	17.36	8.5		19.125	26	17+3+6	24.625
		588 thick	5.2			9.2			9.6			11.2			11.1			12.8			13.2			16.5			20.1			20.2			NA			NA
		588 thick	7.2			4			4.6			1.2	broken		8.6			7.5	broken		12.6			18.2			17.9			NA			32	(20+6+6)		39	29+10
		588 thick	3.2			6			3.5	epithized		8.2			2.3			11.1			15.2			19.5			18.5			29.3	multiple branches (25.3+4)		19.9	epithized broke		23	21+2
		588 thick	3.5			5.2			6.8			5.7			5.9			3.4			14.1			20.1			NA	missing branch		9.5	broke		32.2	epi (21.2+11)		26	23+3
		588 thick	5.2		4.86	6.2		6.12	7.2		6.34	7.1		6.68	9.1		7.4	4.5		7.86	NA	broken tip	13.775	18.6	multiple branches (15.2+3.4)	18.58	29.8	multiple branches (17.8+4+5+3)	21.575	27.5	multiple branches (17.5+5+5)epi	21.625	11.1		23.8	13.1		25.275
9	San Cristobal	587 thin	5.2			5.4			6.2			6.6			6.6			9.2			6.6			10.7	multiple branches (7.5+3.2)		9.5			NA			24	(17+7)		13.2	11.2+2
		587 thin	3.1			4.8			7.4			7.6			9.5			9.8			11.1	multiple branches (10.1+1)		4.5			NA	missing branch		7.2	broke		8.9	broken		NA
		587 thin	6.9			3.4			5.6			4			7.2			7.5			8.8	multiple branches (7.3+1.5)		16.1	multiple branches (12.5+3.6)		18.5	multiple branches (13.5+5)		19.5	multiple branches (14.5+5)		28.5	(20+4+4.5)		17.5	12.5+5
		587 thin	7.2			6.6			3.3			8.2			4.4			5.9			12.5	multiple branches (10.5+2)		18.1	multiple branches (12.1+3+3)		11.5	multiple branches (7.5+4)		24.4	multiple branches (14.4+5+5)		13.2	(9.1+2+2.1)		NA
		587 thin	5.2		5.52	8.2		5.68	7.6		6.02	5		6.28	4.7		6.48	7.2		7.92	15.1	multiple branches (11.2+2.4+1.5)	10.82	NA	missing branch	12.35	15.9	multiple branches (8.9+2+5)	13.85	12.9	multiple branches (8.9+2+2)	16	NA		18.65	27.5	17.5+5+5	19.4
		587 thick	4.9			6.2			6.8			10.7	multiple branches (7.5 + 3.2)		8.5			15.5	epithized		9.8			12.5			5.7	dead		NA			NA			NA
		587 thick	7.2			6			7.2			7.7			5.6			6.2	broken		10.5			13.1			NA	missing branch		26.2	epithized		34.4	(24.4+5+5)		21.4
		587 thick	3.9			4.8			3.8			5.2			7.5	epithized		13.5	multple branches (8.5+5)		12.4			8	multiple branches (4.5+3.5)		21.2			20.7	multiple branches (17.7+3)		27.5	epithized		37.2	15+15+7.2
		587 thick	4.9			4.2			4.7			5.5			8.5	epithized		5.5	dead		NA	broken and dead		NA	missing branch		15.9	multiple branches (10.9+5)		18.7	multiple branches (13.7+5)		21.3	(19.3+2)		24	broken
		587 thick	5.3		5.24	5.4		5.32	6.6		5.82	6.7		7.16	5.9		7.2	7.5		9.64	NA	broken and dead	10.9	NA	missing branch	11.2	17.5	multiple branches (12.5+5)	15.075	22.2	multiple branches (15.2+7)	21.95	20.1	broken	25.825	21.3	OG	25.975
10	San Cristobal	586 thin	2.2			3.4			3.7			3.3			3.8			4.5			4.2			3.5	broken		6.5	broken		3.2	broke		4.1			4.9
		586 thin	3.2			3.8			5			4.5			3.6			2.6			2.8	broken		5.6			3.2	broken		7.5			9.5			10.6
		586 thin	5.4			3.4			3.5			3.6			2.6			5			5.6			5.8			6.5	multiple branches (4.5+2)		7.6			9.2			11.1	broken
		586 thin	3.6			3.2			3.6			3.8			4.5			2.9	broken		2.8	broken		3.9	broken		3.7	broken		4.5	broke		4.8			3.9
		586 thin	3.4		3.56	4.8		3.72	3.6		3.88	3.2	broken	3.68	3.5	broken tip	3.6	4		3.8	5.8		4.24	8.9		5.54	15.1	multiple branches (10.1+5)	7	10.8	multiple branches (7.8+3)	6.72	11.2	(8.2+3)	7.76	10.1		8.12
		586 thick	5.1			4.8			6			8.2			5.9			6			8.2			15.1			NA	missing branch		NA			NA			NA
		586 thick	3.7			5.2			6.2			8.4			8.5			10.5			8.5			13.8			13.9	epithized		15.5	multiple branches (10.5+5)		8.2	epithized		12.5	OG
		586 thick	5.4			6.4			5.8	damaged		6.2			9.4			6.5	dead		6.5	epithized		12.9	multiple branches (8.9+2+2)		20.2	multiple branches (13.2+3+4+5)		24.2	multiple branches (21.2+3) epi		19.2	(13.2+3+3) epi		22.2	20+2.2
		586 thick	5.5			7			6.8			6.2	broken		8.2	epithized		6.5	dead		11.6	epithized		16.5	multiple branches (10.5+3+3)		18.5	multiple branches (12.5+3+3)		17.5	multiple branches (12.5+5) epi		27.1	(20+7.1) epi		16.9	broken
		586 thick	5.6		5.06	6		5.88	7.8		6.52	7.5		7.3	6.5	epithized	7.7	7.5	dead	7.4	3.9	epithized	7.74	4.7	epithized	12.6	5.6	epithized	14.55	7.8	epithized	16.25	15.9	broken	17.6	30.2	21+9.2	20.45

## Sheet: Mario-growth
Acropora cervicornis linear extension
			Trip 1	Trip 1	Trip 1	Trip 2	Trip 2	Trip 2	Trip 3	Trip 3	Trip 3	Trip 4	Trip 4	Trip 4	Trip 5	Trip 5	Trip 5	Trip 6	Trip 6	Trip 6	Trip 7	Trip 7	Trip 7	Trip 8	Trip 8	Trip 8	Trip 9	Trip 9	Trip 9	Trip 10	Trip 10	Trip 10	Trip 11	Trip 11	Trip 11	Trip 12	Trip 12	Trip 12
			2015-09-04	2015-09-04	2015-09-04	2015-09-23	2015-09-23	2015-09-23	2015-10-13	2015-10-13	2015-10-13	2015-11-04	2015-11-04	2015-11-04	Skipped	Skipped	Skipped	2015-12-10	2015-12-10	2015-12-10	2016-02-01	2016-02-01	2016-02-01	2016-03-17	2016-03-17	2016-03-17	2016-04-27	2016-04-27	2016-04-27	2016-06-09	2016-06-09	2016-06-09	2016-07-21	2016-07-21	2016-07-21	2016-08-29	2016-08-29	2016-08-29
Overall	Location	Colony	Measurements (cm)	notes	Average	Measurements (cm)	notes	Average	Measurements (cm)	notes	Average	Measurements (cm)	notes	Average	Measurements (cm)	notes	Average	Measurements (cm)	notes	Average	Measurements (cm)	notes	Average	Measurements (cm)	notes	Average	Measurements (cm)	notes	Average	Measurements (cm)	notes	Average	Measurements (cm)	notes	Average	Measurements (cm)	notes	Average
1	Mario	983 thin	3.2	thin= prolifera		3.2			4.5			5.2						5.2			2.5			3.9			4.4			7.5			NA	NA	NA	11.1	OG
		983 thin	3.6			2.8			3.6			3.5						3.5			3.5			7.8			7.9			14.5	multiple branches (9+5.5)		NA	NA	NA	11.2
		983 thin	2.2			3.4			4.6			5						4.9			6.5			10.5			5.6	broken		6.2	broken		NA	NA	NA	10.2
		983 thin	3.2			4.6			3.4			4.2						1	broken		9.2			9.4			5.9			12.2	multiple branches (10.2+2)		NA	NA	NA	11.9	OG
		983 thin	3.3		3.1	3.8		3.56	4.5		4.12	4.6		4.5				7.1		4.34	1	broken	4.54	3.4	broken	7	12.4		7.24	14.5	multiple branches (9.5+3+2)	10.98	NA	NA	NA	NA
		983 thick	6.8	thick= cervicornis		7.6			8.7			9.8						8.2			9.5			15.2			5.9	epithized		17			NA	NA	NA	21.5	10.5+5	11.1
		983 thick	4.8			5			12.5			9.5						15.4			12.5			10.8			NA	missing branch		15.1			NA	NA	NA	15.6
		983 thick	11.2			12.2			8.6			9.5						11.3			12.4			17.8	multiple branches (10.8+2+3+2)	4.625	22.2	multiple branches (19.2+3)		27.5	multiple branches (16.5+6+5)		NA	NA	NA	20.5	OG
		983 thick	7.1			7.8			8.7			11.5						7.9	broken		16.6	broken		19.5	multiple branches (14.5+2+3)		25.2	multiple branches (13.2+4+4+4+4)		NA			NA	NA	NA	23.9
		983 thick	6.2		7.22	8.2		8.16	6.8		9.06	9	multiple branches (7.2 + 1.8)	9.86				11.9		10.94	5	broken	11.2	NA	broken	15.825	27	multiple branches (18.5+5.5+3)	20.075	21.5	epithized	20.275	NA	NA	NA	NA		20.375
2	Mario	984 thin	3.4			3.8			4.5			6.1						4.5			7.7	multiple branches (6.2+1.5)		7.2			10.5			7.5			NA			9.2
		984 thin	4.2			4.2	broken		3.5			5.1						7.4	multiple branches (6.2+1.2)		8.4	multiple branches (7.2+1.2)		8.9			8.9			6.2			4.8	broken		4.1
		984 thin	5			4.4			3.6			5.5						6.2	multiple branches (5.2+1)		5.5			9.8			14.9	multiple branches (11.9+3)		7.2	epithized		8.2	(6+2.2)		NA
		984 thin	4.8			3.8			4.8			4.9						4.6			13.5	multiple branches (8.2+3.1+2.2)		10.2			6.9	epithized		4.5	broken		7.5	(5+2.5)		9.9	6+3.9
		984 thin	4.2		4.32	5.2		4.28	5.8		4.44	6.8	multple branches (5.8 + 1)	5.68				5.9		5.72	NA	broken	8.775	NA	broken	9.025	NA	missing branch	10.3	NA		6.35	5.5	broken	6.5	5		7.05
		984 thick	6.2			6.4			7.2			7.5						13.1	multiple branches (9.1+4)		12.4			14.9			10.5	broken		2	broken		7.5			8.5
		984 thick	6.2			8.2			6.2			6.8						14.8	multiple branches (10.6+4.2)		10.5			21.5	multiple branches (14.5+7)		11.5	epithized		3.1	broken		10.2			12.5
		984 thick	6.4			7.2			6.8			12.3	multiple branches (10.5 + 1.8)					9.1			22.2	multiple branches (10.2+6.2+5.8)		24.5	multiple branches (12.5+6+6)		2	broken		10.5	broken		2.3	broken		8.2
		984 thick	7.8			6			7.8			9.4	multiple branches (7.9 + 1.5)					10.2			17.2	multiple branches (11.8+5.4)		26	multiple branches (16.5+9.5)		23.4	multiple branches (15.4+5+3)					NA			NA
		984 thick	5.8		6.48	8.6		7.28	8.9		7.38	7.7	multiple branches (6.5 + 1.2)	8.74				10.4		11.52	21.3	multiple branches (14.5+6.8)	16.72	11.2	epithized	19.62	26.3	multiple branches (17.3+3+3+3)	14.74	27.2	multiple branches (20+3.2+4)	10.7	28.2	(21+5+2.2)	12.05	30	22+6+2	14.8
3	Mario	985 thin	2.4			6.2	multiple branches (5.2+1)		4			6.5						3.5	broken		3.1			2.2	mostly dead		8.2	mostly dead		1.5	dead		2	dead		NA	NA	NA
		985 thin	4.2			4			5.4			3.6						6.2			7.2	broken		7.8	mostly dead		2	dead		2	dead		7	dead		NA	NA	NA
		985 thin	4			3.4			5.6			5.6						3.8			3.2			2.4	mostly dead		3.5	dead		1.5	broken		6	broken		NA	NA	NA
		985 thin	3.8			5.6			3.8			3.2						8.2	multiple branches (6.7+1.5)		7.1			7.5	mostly dead		2.5	mostly dead		3.2	broken		NA			NA	NA	NA
		985 thin	5.4		3.96	3.2		4.48	3.8		4.52	6.6	multiple branches (5.6 + 1)	5.1				5.2		5.38	3.5	dead	4.82	7.8	mostly dead	5.54	1.5	dead	3.54	13.5	multiple branches (8.5+2+3)	4.34	NA		5	NA	NA	NA
		985 thick	2.4			3			6.5			7.6						2.3	broken		7.2			9.2	epithized		9.5	epithized		14.2			NA			NA	NA	NA
		985 thick	3.2			6.8			8			4.5						6.7			6.5			9.8	epithized		8.5	epithized		12.2	epithized		17.5	(13.2+4.3)		NA	NA	NA
		985 thick	3			3.4			3.6			10	multiple branches (8.5 + 1.5)					9.8	multiple branches (7.3+2.5)		7.7			10.5	epithized		7	broken		9	epithized		13.2	epi		NA	NA	NA
		985 thick	6.4			7.2			7.5			2.3	broken					5.2			13.2	multiple branches (8.3+4.9)		8.6	epithized		NA	missing branch		NA			15.1	epi		NA	NA	NA
		985 thick	6.2		4.24	6.2		5.32	4.2		5.96	NA		6.1				6.2		6.04	NA	broken	8.65	NA	broken	9.525	10.9	epithized	8.975	16.5	multiple branches (11.5+3+2)	12.975	9.4	epi	13.8	NA	NA	NA
4	Mario	986 thin	5.2			4.2			4.5			6.2						1.2	broken		3.2	broken		3.5			NA	epithized/broken		5.5	broken		NA			NA
		986 thin	4.2			2.8			5.9			6.5						5.4			6.4			4.6	broken		NA	epithized/broken		3.8	broken		6.5	broken		6.3
		986 thin	4.8			4			3.8			4.8						7.7			7			7.6			NA	epithized/broken		11.8	multiple branches (9.8+2)		9.2	broken		11.2	9+2.2
		986 thin	4.2			6.2			6.5			3.6						5.6			5.9			8.7			NA	epithized/broken		NA			6.7	broken		NA
		986 thin	2.2		4.12	4.2		4.28	4		4.94	3.9	bleached	5				4.2		4.82	4.9		5.48	4.5	epithized	5.78	NA	epithized/broken	NA	NA		7.03333	NA		7.46667	7.4		8.3
		986 thick	5.2			4.8			7.5			7.3						8.2			11.2			9.6			10.6			9.8			48	(12+ 9 X 4)		NA
		986 thick	7.2			7.4			5.5			5.6						9.2			9.4			9.2			8.9	broken		14.5	multiple branches (11.5+3)		32.1	(15.1+15+2)		30.2	15+5+5+5
		986 thick	5.2			5.4			6.2			6.5						7.2			10.2			11.2			27.5	multiple branches (12.5+6+5+3)		42	multiple branches (10+ 8 X 4)		10.2			16.2	OG
		986 thick	4.8			5.6			6			9.2						6.2	broken		12.5	multiple branches (9.5+3)		21.6	multiple branches (10.6+4+4+3)		19.6	multiple branches (10.6+4+5)		17.5	multiple branches (13+4.5)		16.2	(12+4.2)		17.5	12+5.5
		986 thick	5.8		5.64	8.4	multiple branches (7.2+1.2)	6.32	6.5		6.34	6.8	broken	7.08				7.5		7.66	NA	broken	10.825	16.7	multiple branches (10.2+4.5+2)	13.66	11.2		15.56	25.5	multiple branches (13.5+5+7)	21.86	15.2	(12+3.2)	24.34	50	12+10+8+20	28.475
5	Mario	987 thin	6.2			3.2			3.7			3.7	epithized					5.7			5.6			NA	NA	NA	9.2	multiple branches (7.2+2), epithized		12.2	epithized		NA			NA
		987 thin	5.2			3.6	broken		4.2			6.6						4.2	epithized		5.8	epithized		NA	NA	NA	NA	missing branch		8.9	epithized		NA			NA
		987 thin	4.8			3.6			4.4			3.8	epithized					9.1	multiple branches (6.6+2.5)		6.5			NA	NA	NA	9.6	epithized		NA			9.2	epi		8.5	dead
		987 thin	7.4			6.2			6.6			5						4.5			7.8			NA	NA	NA	11.2	epithized		NA			13.3	(8.3+3+2)		15.2	12+3.2
		987 thin	8.4		6.4	5.8	multiple branches (4.6+1.2)	4.48	3.7		4.52	6.5		5.12				4.1	epithized	5.52	NA	broken	6.425	NA	NA	NA	11.4	multiple branches (9.4+2)	10.35	12.2	multiple branches (7.2+2+3)	11.1	13.2	epi	11.9	16	epi	13.2333
		987 thick	3			7.2			5.9			6.6						3.6	broken		3.5	broken		NA	NA	NA	NA	epithized/broken		NA			15.5	epi		NA
		987 thick	3.2			5.2			3.2	broken		3.7	broken					NA			7.5			NA	NA	NA	NA	epithized/broken		NA			12.2	epi		15.5
		987 thick	4.2			3.4	broken		8.2			7.8						5.6			8.8			NA	NA	NA	NA	epithized/broken		13.1	epithized		20.2	(15.2+5) epi		23.2	16+7.2
		987 thick	6.2			4.6			6.6			4.5						6.9			5.9	algal overgrowth		NA	NA	NA	NA	epithized/broken		14.5	epithized		NA			16.2	OG
		987 thick	3		3.92	3.2		4.72	3.8		5.54	NA		5.65				4.9		5.25	5.2	algal overgrowth	6.18	NA	NA	NA	NA	epithized/broken	NA	NA		13.8	12.9	epi	15.2	NA		18.3
6	Mario	988 thin	4.2			4.8			4.4			5.6						9	multiple branches (7.5+1.5)		7.2			13.2	multiple branches (11.2+2)		11.2			17	multiple branches (12+5)		18.2	(16+2.2)		20
		988 thin	4.2			5			4.7			6.6						6.9			7.5			11.2			8.9	broken		12.8			NA			20.5	15+5.5
		988 thin	3.2			4.4			4.3			4						1	broken		8.5			15.2			17.8			17.8			13.1			NA
		988 thin	3			3	broken		3.1			1	broken					4.5			12	multiple branches (8.4+3.6)		14.5	multiple branches (10.5+4)		16.8	multiple branches (14+2.8)		9.5	broken		17.9			14.1
		988 thin	4.4		3.8	3.6		4.16	3	broken	3.9	6.1		4.66				7.5		5.78	NA	broken	8.8	NA	broken	13.525	12.5	multiple branches (10.5+2)	13.44	NA		14.275	18.2	(13+5.2) epi	16.85	18.1	15+3.1	18.175
		988 thick	4.2			2			6.1			1	broken					5.7			10.4			13.6			15.7			18.5			NA			25
		988 thick	4.2			2.4			6.7			3	broken					4.2			8.7			15.2			8.2	broken		13	multiple branches (10+3)		21			13.5
		988 thick	2.8			5			5.7			5.6	broken					6.2			10.2			11.5	multiple branches (7.5+4)		8.9	broken		8	broken		14.5			NA
		988 thick	4.8			5.2			3.3			6.5						6.3			6.5			14.8	multiple branches (10.8+2+2)		11.6			NA			9.1			NA
		988 thick	3.2		3.84	4.6		3.84	5.2		5.4	6.6		4.54				7.2		5.92	8.3	multiple branches (6.2+2.2)	8.82	NA	broken	13.775	18.5	multiple branches (10.5+4+4)	12.58	8.8		12.075	14.1	(11+3.1)	14.675	11.1	OG	16.5333
Trip 1.1	2015-09-09	2015-09-09	2015-09-09	2015-09-09	2015-09-09	2015-09-23	2015-09-23	2015-09-23
7	Mario	989 thin	3.2	thin= knoby cerivcornis		3.4			2.9			3.4						NA			6.7			10.8	multiple branches (8.5+2) epithized		7.5	epithized		NA			NA			9.3	broken
		989 thin	3			3.6			3.1			2.4						NA			7.2			9.8			NA	missing branch		NA			NA			30	18+12
		989 thin	2.4			3.2			4.3			4.7						NA			5.9			8.7			13.4	multple branches (9.4+4)		9.7	epithized		9.9	broken		NA
		989 thin	4.8			2.8			3.6			6.1						NA			9.2			7.2	epithized		18.2	multiple branches (11.2+4+3)		14.6	epithized		15.3	epi		NA
		989 thin	3.8		3.44	5.2		3.64	4.7		3.72	5.5		4.42				NA		NA	NA	broken	7.25	NA	broken	9.125	NA	missing branch	13.0333	23.2	multiple branches (21.2+2)	15.8333	23.9	(21.9+2)	16.3667	15.7	epi	18.3333
		989 thick	3.2	thick=prolifera		3.4			4.5			7.8						NA			10			11.9			8.9			NA			NA			NA	NA	NA
		989 thick	3.2			3.8			5			5.89						NA			9.8			8.9			14.5			21.2	diseased		22.5	diseased		NA	NA	NA
		989 thick	6.2			4.6			5.2			5.8	broken					NA			6.2			7.9			14.2			19	multiple branches (9.5+5.5+4)		9.5			NA	NA	NA
		989 thick	4			5.4			6.7			5.4						NA			7.7			6.9			12.3			8.5	epithized		21.1	(11.1+10)		NA	NA	NA
		989 thick	6.8		4.68	8.2		5.08	8.9		6.06	6.2		6.218				NA		NA	5.9		7.92	12.1		9.54	8.7		11.72	NA		16.2333	NA		17.7	NA	NA	NA
8	Mario	990 thick	2.8	only prolifera		2.8			5.8			4						7.5						8.8			2	broken		NA	NA	NA	NA	NA	NA	12.2	OG
		990 thick	4.6			5			5.4			4.5						5.7						7.5			NA	missing branch		NA	NA	NA	NA	NA	NA	14.5
		990 thick	4.2			2.8			5.2			6						8.4	multiple branches (6.2+2.2)		couldn't find			15	multiple branches (9.8+3.2+2)		20.5	multiple branches (12.5+4+4)		NA	NA	NA	NA	NA	NA	21.2	epi
		990 thick	2.2			5.2			3.6			6.5						5.2						15	multiple branches (11.5+3.5)		19.7	multiple branches (12+7.7)		NA	NA	NA	NA	NA	NA	14.9
		990 thick	5		3.76	4.2		4	3.3		4.66	5.7		5.34				6.6		6.68				20.2	multiple branches (10.2+4.5+5.5)	13.3	16.2	multiple branches (12.2+4)	14.6	NA	NA	NA	NA	NA	NA	13.7	epi	15.3
9	Mario	991 thin	2.4	only cervicornis		2.4			3.3			NA						NA						NA	NA	NA	NA	NA	NA	NA	NA	NA	NA	NA	NA	NA	NA	NA
		991 thin	2.2			3.2			4.3			NA						NA						NA	NA	NA	NA	NA	NA	NA	NA	NA	NA	NA	NA	NA	NA	NA
		991 thin	3			3			3.6			NA	couldn't find					NA			couldn't find			NA	NA	NA	NA	NA	NA	NA	NA	NA	NA	NA	NA	NA	NA	NA
		991 thin	3.2			3.6			NA			NA						NA						NA	NA	NA	NA	NA	NA	NA	NA	NA	NA	NA	NA	NA	NA	NA
		991 thin	3.6		2.88	3.8		3.2	NA		3.73333	NA		NA				NA		NA				NA	NA	NA	NA	NA	NA	NA	NA	NA	NA	NA	NA	NA	NA	NA
10	Mario	992 thick	3.6	only prolifera		4.2			5			NA						NA						8.9			NA	NA	NA	NA	NA	NA	NA	NA	NA	NA	NA	NA
		992 thick	3.4			4			4.4			NA						NA						19.4	multiple branches (11.4+4+4) epithized		NA	NA	NA	NA	NA	NA	NA	NA	NA	NA	NA	NA
		992 thick	3			4.2			4.6			NA	couldn't find					NA			couldn't find			14.6	multiple branches (9.6+5)		NA	NA	NA	NA	NA	NA	NA	NA	NA	NA	NA	NA
		992 thick	3.2			4.4			3.6			NA						NA						13.6	multiple branches (9.6+2+2)		NA	NA	NA	NA	NA	NA	NA	NA	NA	NA	NA	NA
		992 thick	4.8		3.6	3.2		4	4.2		4.36	NA		NA				NA		NA				13.2	multiple branches (10.8+2.4)	13.94	NA	NA	NA	NA	NA	NA	NA	NA	NA	NA	NA	NA

## Sheet: Media Luna-growth
Acropora cervicornis linear extension
			Trip 1	Trip 1	Trip 1	Trip 2	Trip 2	Trip 2	Trip 3	Trip 3	Trip 3	Trip 4	Trip 4	Trip 4	Trip 5	Trip 5	Trip 5	Trip 6	Trip 6	Trip 6	Trip 7	Trip 7	Trip 7	Trip 8	Trip 8	Trip 8	Trip 9	Trip 9	Trip 9	Trip 10	Trip 10	Trip 10	Trip 11	Trip 11	Trip 11	Trip 12	Trip 12	Trip 12
			2015-09-11	2015-09-11	2015-09-11	2015-09-24	2015-09-24	2015-09-24	2015-10-16	2015-10-16	2015-10-16	2015-11-04	2015-11-04	2015-11-04	2015-11-19	2015-11-19	2015-11-19	2015-12-08	2015-12-08	2015-12-08	NA	NA	NA	2016-03-16	2016-03-16	2016-03-16	2016-04-26	2016-04-26	2016-04-26	2016-06-08	2016-06-08	2016-06-08	2016-07-21	2016-07-21	2016-07-21	2016-08-29	2016-08-29	2016-08-29
Overall	Location	Colony	Measurements (cm)	notes	Average	Measurements (cm)	notes	Average	Measurements (cm)	notes	Average	Measurements (cm)	notes	Average	Measurements (cm)	notes	Average	Measurements (cm)	notes	Average	Measurements (cm)	notes	Average	Measurements (cm)	notes	Average	Measurements (cm)	notes	Average	Measurements (cm)	notes	Average	Measurements (cm)	notes	Average	Measurements (cm)	notes	Average
1	Media Luna	791	2.4			5.2			5.6			7			7.7			9.2						15.2			8.8			NA			18.2			20.2	epi
		791	3			3.4			3.8			4.2			3.8	broken		8.5						12.5			14.5			12.2			19.2			20.1
		791	3.2			4.4			3.8			6.3			6.5			7.5						7.9			13.2			15.1	multiple branches (13.1+2)		16.3			NA
		791	2.8			3.6			4.5			6.2			5.4			6.6						14.9			8.5	broken		26.5	multiple branches (16.5+5+5)		NA			29	17+6+6
		791	3.2		2.92	3		3.92	4.8		4.5	5.5		5.84	6.2		5.92	6.2		7.6				14.3		12.96	16.5		12.3	NA		17.9333	27.5	(17.5+5+5)	20.3	18		21.825
2	Media Luna	792	3.2			4.4			4.2			5.6			6			5.2						12	multiple branches (7+5)		14.5			18.7			21	(12+9)		NA	NA	NA
		792	2.2			2.8			4.4			6.1			5.8			5.4						12	multiple branches (7+2+3)		17.2			9.5	multiple branches (7.5+2)		14.2	(9.2+2+3)		NA	NA	NA
		792	4.2			4.2			3.8			5.9			2.2	broken		6.4						5.9			17.3	multiple branches (10.3+3+4)		14.5	epithized		15.4			NA	NA	NA
		792	3.4			4.8			4.5			4.8			4.9			7.7	multiple branches (6.2 + 1.5)					8.9			NA	missing branch		13.9	multiple branches (8.9+2+3)		11.1			NA	NA	NA
		792	3.4		3.28	3.2		3.88	4.6		4.3	5.1		5.5	5.5		4.88	2.2	broken	5.38				3.4	broken	8.44	18.9	multiple branches (11.9+3+4)	16.975	22.3		15.78	23.4		17.02	NA	NA	NA
3	Media Luna	793	3.4			4.8			3.2			4.2			4.4			5.2						7.5			5.6	broken		12.2			NA			NA
		793	3.2			2.6	broken		3.6			6.4			2.6			8.8	multiple branches (6.6 + 2.2)					14.9	multiple branches (10.4+4.5)		9.8			9.5			11.1			12.5
		793	5.2			4.4			5.6			3.2			3.9			4.8						7.9			9.9	missing branch		8.9			9.2			12	WB
		793	2.4			2.2			NA	Broke off		2.6			7.7	multiple branches (6.2+1.5)		2.4	broken					11.9			11.1			10.2			8.9			15	WB
		793	5.4		3.92	3		3.4	2.2		3.65	3.8		4.04	4.4		4.6	5.5		5.34				4.5	broken	9.34	10.5		9.38	NA		10.2	13.3		10.625	9.5		12.25
4	Media Luna	794	2.8			4.2			4.1			4.4			5			6.8	multiple branches (5.8 +1)					14	multiple branches (9.5+4.5)		10.5			NA			NA			NA
		794	4.8			5.4			6	broken		5.2			6.4			5.6						15.8	multiple branches (11.6+4.2)		12.5			16.1	multiple branches (11.1+5)		23	(15.5+5+2.5)		18.5	epi
		794	5.2			4			4.8			6.6			5.4			6.2						9.5			11.9			12.2	epithized		13.2	epi		25	17+3+5
		794	4			2.6			3.2			5.5			7	multiple branches (6+1)		5.2	broken					5.9			9.9			21.2	multiple branches (14.2+7)		NA			NA
		794	2.2		3.8	3.2		3.88	4.4		4.5	6.7		5.68	5.9		5.94	7.2		6.2				3.4	broken	9.72	10.7		11.1	NA		16.5	16.9	broken	17.7	15	broken	19.5
5	Media Luna	795	5.2			6.2			6.4			6.7			7.5			8.2						11.7	multiple branches (7.2+4.5)		12.6			11.2			10.1	broken		NA
		795	2.4			3.2			5.7			6.9			7.2			7.5						11.9			10.2			19.3	mutliple branches (17.3+2)		20.3	(18.3+2)		18.2	15.2+3
		795	2.6			2.6			4.3			5.2			5.4			7.2						10.4			12.2			14.2	epithized		14.9			11.3	broken
		795	2.8			5.2			3.6			4.5			3.6	broken		1.6	broken					12.9			NA	missing branch		14.2	multiple branches (11.2+3)		15.2	broken		24.2	20+4.2
		795	5.2		3.64	3.2		4.08	4.2		4.84	3.6		5.38	7		6.14	6		6.1				2.6	broken	9.9	18.5	multiple branches (12.5+6)	13.375	NA		14.725	NA		15.125	11.1		16.2
6	Media Luna	796	1.2			4.4			5			5.2			8.9	multiple branches (7.4+1.5)		8.6						6.4			8.9			8.9			NA			12.5
		796	2.2			2.2			5.6			7.2			7.2			4.6						7.8			NA	missing branch		NA			9.4			13.2
		796	5.4			2.8			2.7			4.4			7.8			4.5	broken					9.1			10.1			13.3	multiple branches (11.3+2)		15.3	(11.3+4)		20.2	15+5.2
		796	5.8			4.6			6.2			3.7			4.2			5.8						10.5			17.2	multiple branches (12.2+3+2)		25.5	multiple branches (11.5+7+7)		27.5	(12.5+7+8)		30	17+7+8
		796	4.4		3.8	5		3.8	3.2		4.54	5.7		5.24	4.5	broken	6.52	8.2		6.34				4.6	broken	7.68	16.9	multiple branches (11.9+2+3)	13.275	13.5	multiple branches (9.5+2+2)	15.3	14.1		16.575	NA		18.975
7	Media Luna	797	4			2.8			4.8			3.4			5.5			3.8						8.5			9.9	multiple branches (7.9+2)		16.5			NA			NA
		797	4.2			3.6			4.2			5.3			3.5			6.2						10.5			11.9	multiple branches (8.9+3)		8.2	multiple branches (7.2+1)		18.5			16.7
		797	3.2			4.2			4			4.7			6.6	broken		4.6						11.5			NA	missing branch		11.1			21.1	(19.1+2)		10.3	7+3.3
		797	3.4			4.4			6.2			7.1			4.8			6.8						5.5	broken		7.1	broken		NA			12.1	)		23	18+2+3
		797	3.3		3.62	3.2		3.64	3.4		4.52	4.6		5.02	6		5.28	6.2		5.52				8.5		8.9	9.5	multiple branches (4.5+2+3)	9.6	19.2	multiple branches (15.2+2+2)	13.75	9		15.175	11	epi	15.25
8	Media Luna	798	3.2			2.8			3.3			3.7			3.5			4						8.9			9.5			11.1			14.5			NA
		798	3.2			2.8			3.4			3.8			4.2			5						3	broken		7.8			11.5	multiple branches (9.5+2)		10.1			24	14+10
		798	3.6			3.2			3.8			4.6			4.4			7.4						12	multiple branches (8+2+2)		NA	missing branch		2	broke		NA			4	broken
		798	2.2			3.4			2.6	broken		2.4			7.2			5.2						2	broken		7.9	multiple branches (5.9+2)		21.8	multiple branches (11.6+3.2+6)		3	broken		15.1
		798	2.4		2.92	3.8		3.2	3.4		3.3	6		4.1	2.3	broken	4.32	1.5	broken	4.62				13	multiple branches (13)	7.78	14.2	multiple branches (9.2+5)	9.85	NA		11.6	22.8	(12.6+3.2+6)	12.6	12.2		13.825
9	Media Luna	799	4.4			3.2			3.6			3.7			4.5	broken		3.4	broken					9.6	multiple branches (6.2+3) epithizied		5.5	epithized		5.5	epithized		6.1	epi		7.9	epi
		799	3.4			3.6			4			5.7	heavily epithized with one big		4.6			5.4						8.2	epithized		8.2	epithized		14.5	epithized		15.2	epi		16	epi
		799	3.6			4.4			3.6	broken		4.7	damsels		5.6	broken		5.2						9.5	epithized		NA	missing branch		20.4	mutlple branches (12.4+8)		21.2	(13+8.2)		13.9	epi
		799	3.8			3.4			4.7			5.6			6.5			5.8						8.2	epithized		8.6	multiple branches (5.6+3)		14.5	epithized		12.9	epi		16.1	epi
		799	3		3.64	4.6		3.84	4.6		4.1	4.8		4.9	4.5		5.14	2.5	broken	4.46				2.6	broken	7.62	16.7	multiple branches (10.2+5+1.5)	9.75	12.7	multiple branches (10.2+2.5) epi	13.52	15.2	epi	14.12	23	16+7	15.38
10	Media Luna	260	5.4			5			6.2			8.8	multiple branches (7.3 + 1.5)		7.9			12.7	multiple branches (9.2 + 3.5)					13.2			13.5			9.2			17.5	broken		NA
		260	4.8			5.2			6.2			6.2			8.2			9.2	multiple branches (7.2 + 1 +1)					12			9.5			NA			NA			11.8	WB
		260	7.4			6.2			6.6			7.5			9.2	multiple branches (7.2+2)		7						7.9			19.2	multiple branches (15.2+4)		8.2			9.8			27	20+7
		260	3.4			8.8			4.6			6.8			9.8			6						16	mulitple branches (11+5)		20.5	multiple branches (13.5+7)		20.2	multiple branches (15.2+5)		8.9			12	broken
		260	5		5.2	5.2	broken	6.08	10.1	multiple branches (9.1 + 1)	6.74	12.1		8.28	6.5		8.32	9.1		8.8				6.4	broken	11.1	NA	missing branch	15.675	23.1	multiple branches (17.2+3+3)	15.175	24.9	(18.9+4+4)	15.275	11.9		15.675

## Sheet: Algal Data
Site	Date	Plot #	Algal acumulation
SC	2015-09-22	586	4.83333
SC	2015-09-22	587	4.2
SC	2015-09-22	588	3.5
SC	2015-09-22	589	4.93333
SC	2015-09-22	590	3.33333
SC	2015-09-22	591	2.9
SC	2015-09-22	592	3.5
SC	2015-09-22	593	7.33333
SC	2015-09-22	594	3.63333
SC	2015-09-22	595	3.05
SC	2015-10-13	586	4.8
SC	2015-10-13	587	3.83333
SC	2015-10-13	588	3.125
SC	2015-10-13	589	5.56667
SC	2015-10-13	590	3.33333
SC	2015-10-13	591	5
SC	2015-10-13	592	3.36667
SC	2015-10-13	593	8
SC	2015-10-13	594	3.73333
SC	2015-10-13	595	3.55
SC	2015-11-03	586	4.1
SC	2015-11-03	587	2.8
SC	2015-11-03	588	4.93333
SC	2015-11-03	589	4.56667
SC	2015-11-03	590	2.9
SC	2015-11-03	591	4.1
SC	2015-11-03	592	3.56667
SC	2015-11-03	593	5.06667
SC	2015-11-03	594	4.43333
SC	2015-11-03	595	2.13333
SC	2015-11-19	586	4.4
SC	2015-11-19	587	2.7
SC	2015-11-19	588	5.13333
SC	2015-11-19	589	4.66667
SC	2015-11-19	590	2.93333
SC	2015-11-19	591	3.83333
SC	2015-11-19	592	3.63333
SC	2015-11-19	593	5.63333
SC	2015-11-19	594	4.7
SC	2015-11-19	595	2.6
SC	2015-12-10	586	3.85
SC	2015-12-10	587	2.73333
SC	2015-12-10	588	8.96667
SC	2015-12-10	589	6
SC	2015-12-10	590	3.1
SC	2015-12-10	591	6.23333
SC	2015-12-10	592	8.9
SC	2015-12-10	593	7.13333
SC	2015-12-10	594	3.73333
SC	2015-12-10	595	2.66667
SC	2016-02-01	586	3.83333
SC	2016-02-01	587	2.5
SC	2016-02-01	588	4.66667
SC	2016-02-01	589	5.76667
SC	2016-02-01	590	4.25
SC	2016-02-01	591	4.35
SC	2016-02-01	592	6.16667
SC	2016-02-01	593	8.5
SC	2016-02-01	594	5.83333
SC	2016-02-01	595	3
SC	2016-03-16	586	3.76667
SC	2016-03-16	587	1.93333
SC	2016-03-16	588	5.26667
SC	2016-03-16	589	4.5
SC	2016-03-16	590	1.5
SC	2016-03-16	591	4.3
SC	2016-03-16	592	9.9
SC	2016-03-16	593	6.16667
SC	2016-03-16	594	5
SC	2016-03-16	595	2.33333
SC	2016-04-26	586	4.83333
SC	2016-04-26	587	4.5
SC	2016-04-26	588	5.26667
SC	2016-04-26	589	6
SC	2016-04-26	590	4.5
SC	2016-04-26	591	3.56667
SC	2016-04-26	592	9
SC	2016-04-26	593	6.06667
SC	2016-04-26	594	4.75
SC	2016-04-26	595	1.9
SC	2016-06-08	586	4.66667
SC	2016-06-08	587	3
SC	2016-06-08	588	5.33333
SC	2016-06-08	589	7
SC	2016-06-08	590	2.5
SC	2016-06-08	591	4.5
SC	2016-06-08	592	5.33333
SC	2016-06-08	593	3
SC	2016-06-08	594	4.25
SC	2016-06-08	595	2
SC	2016-07-21	586	7
SC	2016-07-21	587	15
SC	2016-07-21	588	4
SC	2016-07-21	589	3.75
SC	2016-07-21	590	4
SC	2016-07-21	591	6.66667
SC	2016-07-21	592	5.5
SC	2016-07-21	593	6
SC	2016-07-21	594	6
SC	2016-07-21	595	2
SC	2016-08-29	586	7.33333
SC	2016-08-29	587	5.5
SC	2016-08-29	588	5.75
SC	2016-08-29	589	5.66667
SC	2016-08-29	590	3
SC	2016-08-29	591	6.5
SC	2016-08-29	592	5.33333
SC	2016-08-29	593	5.5
SC	2016-08-29	594	4.5
SC	2016-08-29	595	2.5
Site	Date	Plot #	Algal acumulation
ML	2015-09-24	791	3.73333
ML	2015-09-24	792	5.36667
ML	2015-09-24	793	3.5
ML	2015-09-24	794	2.93333
ML	2015-09-24	795	3.13333
ML	2015-09-24	796	2.9
ML	2015-09-24	797	1.76667
ML	2015-09-24	798	2.53333
ML	2015-09-24	799	2.6
ML	2015-09-24	260	3.9
ML	2015-10-16	791	4
ML	2015-10-16	792	5.16667
ML	2015-10-16	793	4.1
ML	2015-10-16	794	4.66667
ML	2015-10-16	795	3.03333
ML	2015-10-16	796	2.8
ML	2015-10-16	797	2.8
ML	2015-10-16	798	2.26667
ML	2015-10-16	799	2.86667
ML	2015-10-16	260	5.06667
ML	2015-11-04	791	3.6
ML	2015-11-04	792	5.6
ML	2015-11-04	793	3.16667
ML	2015-11-04	794	3.86667
ML	2015-11-04	795	2.5
ML	2015-11-04	796	3.13333
ML	2015-11-04	797	4.16667
ML	2015-11-04	798	2.93333
ML	2015-11-04	799	5.26667
ML	2015-11-04	260	5.33333
ML	2015-11-19	791	3.9
ML	2015-11-19	792	5.06667
ML	2015-11-19	793	3.26667
ML	2015-11-19	794	3.6
ML	2015-11-19	795	2.4
ML	2015-11-19	796	2.43333
ML	2015-11-19	797	4
ML	2015-11-19	798	3.1
ML	2015-11-19	799	5.43333
ML	2015-11-19	260	5.26667
ML	2015-12-08	791	4.93333
ML	2015-12-08	792	5.13333
ML	2015-12-08	793	3.33333
ML	2015-12-08	794	4.03333
ML	2015-12-08	795	4.06667
ML	2015-12-08	796	3.16667
ML	2015-12-08	797	3.93333
ML	2015-12-08	798	3.83333
ML	2015-12-08	799	5.16667
ML	2015-12-08	260	5.86667
ML	2016-02-29	791	4.9
ML	2016-02-29	792	5.2
ML	2016-02-29	793	2.2
ML	2016-02-29	794	5.25
ML	2016-02-29	795	3.9
ML	2016-02-29	796	2.35
ML	2016-02-29	797	4.2
ML	2016-02-29	798	2.76667
ML	2016-02-29	799	3.5
ML	2016-02-29	260	5.5
ML	2016-03-16	791	4.5
ML	2016-03-16	792	4.56667
ML	2016-03-16	793	0.666667
ML	2016-03-16	794	4.5
ML	2016-03-16	795	1.26667
ML	2016-03-16	796	1.66667
ML	2016-03-16	797	3.23333
ML	2016-03-16	798	3.83333
ML	2016-03-16	799	4.83333
ML	2016-03-16	260	5.66667
ML	2016-04-26	791	4.25
ML	2016-04-26	792	6
ML	2016-04-26	793	2
ML	2016-04-26	794	6
ML	2016-04-26	795	3
ML	2016-04-26	796	1.35
ML	2016-04-26	797	3.25
ML	2016-04-26	798	4.23333
ML	2016-04-26	799	4
ML	2016-04-26	260	5
ML	2016-06-08	792	6
ML	2016-06-08	793	2
ML	2016-06-08	794	6.5
ML	2016-06-08	795	2.83333
ML	2016-06-08	796	5.33333
ML	2016-06-08	798	7
ML	2016-06-08	799	5.5
ML	2016-06-08	260	5.25
Site	Date	Plot #	Algal acumulation
Mario	2015-09-23	983	7.23
Mario	2015-09-23	984	4.23
Mario	2015-09-23	985	4.07
Mario	2015-09-23	986	6.3
Mario	2015-09-23	987	2.7
Mario	2015-09-23	988	3.53
Mario	2015-09-23	989	3.3
Mario	2015-09-23	990	2.27
Mario	2015-10-13	983	7.17
Mario	2015-10-13	984	5.33
Mario	2015-10-13	985	4.13
Mario	2015-10-13	986	6.75
Mario	2015-10-13	987	2.63
Mario	2015-10-13	989	2.87
Mario	2015-10-13	990	2.17
Mario	2015-11-04	983	6.27
Mario	2015-11-04	984	5.63
Mario	2015-11-04	985	3.4
Mario	2015-11-04	986	5.03
Mario	2015-11-04	987	4.83
Mario	2015-11-04	988	3.93
Mario	2015-11-04	989	3.6
Mario	2015-11-04	990	1.93
Mario	2015-12-10	983	6.66667
Mario	2015-12-10	984	5.16667
Mario	2015-12-10	985	3.13333
Mario	2015-12-10	986	4.7
Mario	2015-12-10	987	4.23333
Mario	2015-12-10	988	4.16667
Mario	2015-12-10	990	1.9
Mario	2016-02-16	984	5.1
Mario	2016-02-16	985	4
Mario	2016-02-16	986	4.9
Mario	2016-02-16	987	5
Mario	2016-03-17	983	9
Mario	2016-03-17	984	2.67
Mario	2016-03-17	985	5.17
Mario	2016-03-17	986	4
Mario	2016-03-17	988	7.33
Mario	2016-03-17	989	5.13
Mario	2016-03-17	990	1.83
Mario	2016-04-27	983	6.25
Mario	2016-04-27	984	3.5
Mario	2016-04-27	985	4.33
Mario	2016-04-27	986	6.25
Mario	2016-04-27	987	7
Mario	2016-04-27	989	6
Mario	2016-04-27	990	2
Mario	2016-07-21	983	5.5
Mario	2016-07-21	984	6.5
Mario	2016-07-21	985	9
Mario	2016-07-21	986	9
Mario	2016-07-21	987	5.5
Mario	2016-07-21	990	6
Mario	2016-08-29	984	11
Mario	2016-08-29	986	4.66667
Mario	2016-08-29	987	9.5
Mario	2016-08-29	988	4

## Sheet: Fish-inver data
Sampling #	Site	Date	Plot #	Three spot Damsel	Longfin Damsel	Yellowtail Damsel	Bicolor Damsel	Cocoa Damsel	Beaugregory	Red Urchin	Pencil Urchin	French Grunt	Squirrel fish	Mean growth cerv	Mean growth prolif	Growth rate cerv	Growth rate prolif	Algal acumulation	Algae delta
1	SC	2015-09-22	586	3	1	0	0	0	0	0	0	0	0	0.82	0.16	0.05	0.00888889	4.83333
1	SC	2015-09-22	587	2	2	0	0	0	0	0	0	1	0	0.08	0.16	0	0.00888889	4.2
1	SC	2015-09-22	588	2	2	0	0	0	0	4	0	0	0	1.26	0.1	0.07	0.00555556	3.5
1	SC	2015-09-22	589	0	2	0	0	0	0	0	0	0	0	0.04	0.38	0	0.0211111	4.93333
1	SC	2015-09-22	590	0	0	0	1	1	0	0	0	0	1	1.62	0.5	0.09	0.0277778	3.33333
1	SC	2015-09-22	591	2	1	0	0	0	0	0	0	4	1	0.92	0.58	0.05	0.0322222	2.9
1	SC	2015-09-22	592	1	1	0	0	0	0	0	0	0	0	1.24	0.6	0.07	0.0333333	3.5
1	SC	2015-09-22	593	1	1	0	2	0	0	0	0	4	0	0.78	0.92	0.04	0.0511111	7.33333
1	SC	2015-09-22	594	1	1	0	3	0	0	0	0	0	0	0.3	0.66	0.02	0.0366667	3.63333
1	SC	2015-09-22	595	2	1	0	0	0	0	0	0	0	0	0.1	1.32	0.01	0.0733333	3.05
2	SC	2015-10-13	586	5	1	0	0	0	0	0	0	0	0	0.64	0.16	0.03	0.00761905	4.8	-0.0333333
2	SC	2015-10-13	587	4	1	0	0	0	0	0	0	0	0	0.5	0.34	0.02	0.0161905	3.83333	-0.366667
2	SC	2015-10-13	588	4	0	0	0	0	0	0	0	0	0	0.22	0.68	0.01	0.032381	3.125	-0.375
2	SC	2015-10-13	589	4	0	0	1	0	0	0	0	0	1	1.06	1.66	0.05	0.0790476	5.56667	0.633333
2	SC	2015-10-13	590	2	0	1	1	0	0	0	0	20	0	0.64	-0.29	0.03	-0.0138095	3.33333	0
2	SC	2015-10-13	591	3	0	0	0	0	0	0	0	20	0	1.28	0.62	0.06	0.0295238	5	2.1
2	SC	2015-10-13	592	2	0	0	0	0	0	0	0	0	0	0.02	0.7	0	0.0333333	3.36667	-0.133333
2	SC	2015-10-13	593	7	0	0	0	0	0	0	0	0	0	0.36	0.3	0.02	0.0142857	8	0.666667
2	SC	2015-10-13	594	1	0	0	2	0	0	0	0	0	1	0.46	1.64	0.02	0.0780952	3.73333	0.1
2	SC	2015-10-13	595	2	1	0	0	0	0	0	0	0	0	0.04	0.08	0	0.00380952	3.55	0.5
3	SC	2015-11-03	586	2	0	1	0	0	0	0	0	4	0	0.78	0	0.04	0	4.1	-0.7
3	SC	2015-11-03	587	2	0	0	0	0	0	0	0	5	1	1.34	0.26	0.06	0.012381	2.8	-1.03333
3	SC	2015-11-03	588	1	0	0	0	0	0	0	0	5	0	0.34	0.16	0.02	0.00761905	4.93333	1.80833
3	SC	2015-11-03	589	2	0	0	0	0	0	0	0	0	1	0.04	0.08	0	0.00380952	4.56667	-1
3	SC	2015-11-03	590	0	0	1	0	0	0	0	0	0	0	0.98	2.79	0.05	0.132857	2.9	-0.433333
3	SC	2015-11-03	591	2	1	1	0	0	0	0	0	20	0	1.26	0.08	0.06	0.00380952	4.1	-0.9
3	SC	2015-11-03	592	2	0	0	0	0	0	0	0	0	0	2.16	0.4	0.1	0.0190476	3.56667	0.2
3	SC	2015-11-03	593	5	0	0	1	0	0	0	0	1	0	0.32	0.46	0.02	0.0219048	5.06667	-2.93333
3	SC	2015-11-03	594	2	0	0	0	0	1	0	0	0	0	0.1	0.04	0	0.00190476	4.43333	0.7
3	SC	2015-11-03	595	2	1	0	0	0	0	0	0	0	0	0.7	0.52	0.03	0.0247619	2.13333	-1.41667
4	SC	2015-11-19	586	2	1	0	0	0	0	0	1	0	0	0.4	-0.06	0.03	-0.00375	4.4	0.3
4	SC	2015-11-19	587	5	2	0	0	0	0	0	0	0	1	0.04	0.2	0	0.0125	2.7	-0.1
4	SC	2015-11-19	588	1	1	0	0	0	0	0	0	0	1	0.72	2.44	0.05	0.1525	5.13333	0.2
4	SC	2015-11-19	589	5	0	0	0	0	0	0	1	0	1	1.6	0.8	0.1	0.05	4.66667	0.1
4	SC	2015-11-19	590	0	1	0	2	0	0	0	0	0	0	0.06	0.28	0	0.0175	2.93333	0.0333333
4	SC	2015-11-19	591	2	0	0	0	0	0	0	0	10	0	0.16	0.18	0.01	0.01125	3.83333	-0.266667
4	SC	2015-11-19	592	1	3	0	0	0	0	0	0	0	0	1.38	0	0.09	0	3.63333	0.0666667
4	SC	2015-11-19	593	5	0	0	0	0	0	0	0	0	1	0.42	0.68	0.03	0.0425	5.63333	0.566667
4	SC	2015-11-19	594	1	2	0	0	0	0	0	0	0	0	1.02	1.2	0.06	0.075	4.7	0.266667
4	SC	2015-11-19	595	3	2	0	0	0	0	0	0	0	1	-0.02	1.2	0	0.075	2.6	0.466667
5	SC	2015-12-10	586	1	0	1	0	0	0	0	1	0	0	-0.03	0.2	0	0.00952381	3.85	-0.55
5	SC	2015-12-10	587	4	1	0	0	0	0	0	0	0	0	2.84	1.44	0.14	0.0685714	2.73333	0.0333333
5	SC	2015-12-10	588	3	1	0	0	0	0	0	0	0	0	0.46	1.06	0.02	0.0504762	8.96667	3.83333
5	SC	2015-12-10	589	7	0	0	0	0	0	0	0	0	0	3.58	1.46	0.17	0.0695238	6	1.33333
5	SC	2015-12-10	590	1	1	0	1	0	0	0	0	0	0	1.62	-1.14	0.08	-0.0542857	3.1	0.166667
5	SC	2015-12-10	591	2	3	0	0	0	0	0	0	0	0	0.82	0.02	0.04	0.000952381	6.23333	2.4
5	SC	2015-12-10	592	1	1	0	0	0	0	0	0	0	0	-1.38	1	-0.07	0.047619	8.9	5.26667
5	SC	2015-12-10	593	5	0	0	1	0	0	0	0	0	0	0.12	0.16	0.01	0.00761905	7.13333	1.5
5	SC	2015-12-10	594	1	2	0	0	0	0	0	0	0	0	1.02	-0.02	0.05	-0.000952381	3.73333	-0.966667
5	SC	2015-12-10	595	1	2	0	0	0	0	0	0	0	0	0.92	0.62	0.04	0.0295238	2.66667	0.0666667
6	SC	2016-02-01	586	3	0	0	0	0	0	3	0	0	0	1.54	0.44	0.03	0.00830189	3.83333	-0.0166667
6	SC	2016-02-01	587	3	0	0	0	0	0	0	0	0	0	1.26	2.9	0.02	0.054717	2.5	-0.233333
6	SC	2016-02-01	588	1	0	0	0	0	0	0	0	0	0	5.915	0.22	0.11	0.00415094	4.66667	-4.3
6	SC	2016-02-01	589	3	0	0	0	0	0	0	0	1	0	-0.22	1.96	0	0.0369811	5.76667	-0.233333
6	SC	2016-02-01	590	3	0	0	0	0	0	0	0	0	0	1	4.72	0.02	0.0890566	4.25	1.15
6	SC	2016-02-01	591	6	0	0	0	0	0	0	0	0	0	3.5	5.22	0.07	0.0984906	4.35	-1.88333
6	SC	2016-02-01	592	1	0	0	0	0	0	0	0	0	0	6.3	0.72	0.12	0.0135849	6.16667	-2.73333
6	SC	2016-02-01	593	6	0	0	0	0	0	0	0	0	0	2.06	1.56	0.04	0.029434	8.5	1.36667
6	SC	2016-02-01	594	3	0	0	0	0	0	0	0	0	0	0.5	1.02	0.01	0.0192453	5.83333	2.1
6	SC	2016-02-01	595	2	0	0	0	0	0	0	0	0	0	1.98	3.82	0.04	0.0720755	3	0.333333
7	SC	2016-03-16	586	1	0	0	0	0	0	1	0	0	0	4.86	1.3	0.11	0.0302326	3.76667	-0.0666667
7	SC	2016-03-16	587	4	1	0	0	0	0	0	0	0	1	0.3	1.53	0.01	0.0355814	1.93333	-0.566667
7	SC	2016-03-16	588	1	2	0	0	0	0	0	0	0	0	4.805	6.78	0.11	0.157674	5.26667	0.6
7	SC	2016-03-16	589	2	1	0	0	0	0	1	0	0	1	3.18	-1.26	0.07	-0.0293023	4.5	-1.26667
7	SC	2016-03-16	590	1	4	0	0	0	0	0	0	0	0	3.78	0.5666	0.09	0.0131767	1.5	-2.75
7	SC	2016-03-16	591	3	1	0	0	0	0	0	0	0	0	1.78	0.74	0.04	0.0172093	4.3	-0.05
7	SC	2016-03-16	592	1	1	0	0	0	0	0	0	0	1	2.9	2.88	0.07	0.0669767	9.9	3.73333
7	SC	2016-03-16	593	3	0	0	0	0	0	0	0	0	0	0.22	4.3	0.01	0.1	6.16667	-2.33333
7	SC	2016-03-16	594	1	2	0	0	0	0	0	0	0	0	5.14	2.62	0.12	0.0609302	5	-0.833333
7	SC	2016-03-16	595	1	2	0	0	0	0	0	0	0	1	0.82	0.28	0.02	0.00651163	2.33333	-0.666667
8	SC	2016-04-26	586	3	0	0	0	0	0	0	0	0	0	1.95	1.46	0.05	0.0356098	4.83333	1.06667
8	SC	2016-04-26	587	1	2	0	0	0	0	0	0	0	0	3.875	1.5	0.09	0.0365854	4.5	2.56667
8	SC	2016-04-26	588	0	2	0	0	0	0	0	0	0	0	2.995	0.08	0.07	0.00195122	5.26667	0
8	SC	2016-04-26	589	3	1	0	0	0	0	1	0	0	0	2.88	3.66	0.07	0.0892683	6	1.5
8	SC	2016-04-26	590	2	0	0	0	0	0	0	0	0	0	2.11	0.159	0.05	0.00387805	4.5	3
8	SC	2016-04-26	591	2	1	0	1	0	1	0	0	0	0	1.76	0.26	0.04	0.00634146	3.56667	-0.733333
8	SC	2016-04-26	592	2	2	0	0	0	0	0	0	0	0	4.96	1.86	0.12	0.0453659	9	-0.9
8	SC	2016-04-26	593	4	0	0	0	0	0	0	0	0	1	2.6	2.28	0.06	0.0556098	6.06667	-0.1
8	SC	2016-04-26	594	1	1	0	0	0	1	0	0	0	0	1.16	-0.52	0.03	-0.0126829	4.75	-0.25
8	SC	2016-04-26	595	2	2	0	2	0	0	0	0	0	1	1.74	2.52	0.04	0.0614634	1.9	-0.433333
9	SC	2016-06-08	586	2	0	0	0	0	0	3	0	2	0	1.7	-0.28	0.04	-0.00651163	4.66667	-0.166667
9	SC	2016-06-08	587	3	2	0	0	0	0	0	0	0	0	6.875	2.15	0.16	0.05	3	-1.5
9	SC	2016-06-08	588	0	1	0	0	0	0	0	0	0	0	0.05	3.46	0	0.0804651	5.33333	0.0666667
9	SC	2016-06-08	589	4	0	0	0	0	0	0	0	0	1	1.7	4.9	0.04	0.113953	7	1
9	SC	2016-06-08	590	1	1	0	0	0	0	0	0	0	0	9.95	0.575	0.23	0.0133721	2.5	-2
9	SC	2016-06-08	591	5	3	0	0	0	0	0	0	0	1	6.24	4.76	0.15	0.110698	4.5	0.933333
9	SC	2016-06-08	592	2	1	0	0	0	0	0	0	0	0	1.88	3.74	0.04	0.0869767	5.33333	-3.66667
9	SC	2016-06-08	593	3	0	0	0	0	0	0	0	0	1	-1.5	3.375	-0.03	0.0784884	3	-3.06667
9	SC	2016-06-08	594	3	1	0	0	0	0	0	0	0	0	6.2	0.76	0.14	0.0176744	4.25	-0.5
9	SC	2016-06-08	595	2	2	0	0	0	0	0	0	2	0	1.56	8.06	0.04	0.187442	2	0.1
10	SC	2016-07-21	586	3	1	0	0	0	0	0	0	0	0	1.35	1.04	0.03	0.024186	7	2.33333
10	SC	2016-07-21	587	3	1	0	0	0	0	0	0	0	0	3.875	2.65	0.09	0.0616279	15	12
10	SC	2016-07-21	588	3	2	0	0	0	0	0	0	0	0	2.175	1.765	0.05	0.0410465	4	-1.33333
10	SC	2016-07-21	589	3	3	0	0	0	0	0	0	0	0	2.625	0.8	0.06	0.0186047	3.75	-3.25
10	SC	2016-07-21	590	3	1	0	0	0	0	0	0	0	0	0.5	0.4	0.01	0.00930233	4	1.5
10	SC	2016-07-21	591	3	1	0	3	1	0	0	0	0	0	2.4	1.02	0.06	0.0237209	6.66667	2.16667
10	SC	2016-07-21	592	0	1	0	0	0	0	0	0	0	0	1.14	2.28	0.03	0.0530233	5.5	0.166667
10	SC	2016-07-21	593	4	0	0	0	0	0	0	0	0	0	0.25	2.1	0.01	0.0488372	6	3
10	SC	2016-07-21	594	4	3	0	0	0	0	0	0	0	0	1.86	1.835	0.04	0.0426744	6	1.75
10	SC	2016-07-21	595	2	1	0	1	0	0	0	0	0	0	1.72	-0.6	0.04	-0.0139535	2	0
11	SC	2016-08-29	586	2	2	0	0	0	0	0	0	0	0	2.85	0.36	0.08	0.00947368	7.33333	0.333333
11	SC	2016-08-29	587	4	2	0	0	0	0	0	0	0	0	0.15	0.75	0	0.0197368	5.5	-9.5
11	SC	2016-08-29	588	2	1	0	0	0	0	0	0	0	0	1.475	5.5	0.04	0.144737	5.75	1.75
11	SC	2016-08-29	589	4	0	0	0	0	0	0	0	0	0	-0.325	1.465	-0.01	0.0385526	5.66667	1.91667
11	SC	2016-08-29	590	3	1	0	0	0	0	2	0	0	0	1.025	3.066	0.03	0.0806842	3	-1
11	SC	2016-08-29	591	3	1	0	2	0	0	0	0	0	1	2.275	0.26	0.06	0.00684211	6.5	-0.166667
11	SC	2016-08-29	592	3	1	0	0	0	0	0	0	0	0	2.565	-0.02	0.07	-0.000526316	5.33333	-0.166667
11	SC	2016-08-29	593	5	0	0	0	0	0	0	0	0	0	2.25	1.023	0.06	0.0269211	5.5	-0.5
11	SC	2016-08-29	594	5	0	0	0	0	0	0	0	0	0	1.41	-0.325	0.04	-0.00855263	4.5	-1.5
11	SC	2016-08-29	595	1	1	0	0	0	0	0	0	0	0	1.96	-0.86	0.05	-0.0226316	2.5	0.5
1	ML	2015-09-24	791	0	0	1	0	0	0	4	0	0	0	1		0.0769231		3.73333
1	ML	2015-09-24	792	2	2	0	0	0	0	18	2	0	0	0.6		0.0461538		5.36667
1	ML	2015-09-24	793	2	0	0	0	0	1	0	0	0	0	-0.52		-0.04		3.5
1	ML	2015-09-24	794	3	0	0	0	0	0	1	0	0	1	0.08		0.00615385		2.93333
1	ML	2015-09-24	795	0	0	0	0	0	0	2	0	0	1	0.44		0.0338462		3.13333
1	ML	2015-09-24	796	1	0	1	0	0	0	2	0	0	1	0		0		2.9
1	ML	2015-09-24	797	1	0	0	0	0	0	0	0	0	0	0.02		0.00153846		1.76667
1	ML	2015-09-24	798	0	2	0	1	0	0	0	0	0	0	0.28		0.0215385		2.53333
1	ML	2015-09-24	799	1	0	0	0	0	0	0	0	0	0	0.2		0.0153846		2.6
1	ML	2015-09-24	260	0	1	0	0	0	0	0	0	0	0	0.88		0.0676923		3.9
2	ML	2015-10-16	791	0	0	1	0	0	0	3	0	0	0	0.58		0.0263636		4	0.266667
2	ML	2015-10-16	792	1	0	0	0	0	0	2	0	0	0	0.42		0.0190909		5.16667	-0.2
2	ML	2015-10-16	793	2	0	0	0	0	0	0	0	0	0	0.25		0.0113636		4.1	0.6
2	ML	2015-10-16	794	2	0	0	0	0	1	0	0	0	0	0.62		0.0281818		4.66667	1.73333
2	ML	2015-10-16	795	0	0	0	0	0	0	1	0	1	1	0.76		0.0345455		3.03333	-0.1
2	ML	2015-10-16	796	1	0	0	0	0	0	2	0	2	0	0.74		0.0336364		2.8	-0.1
2	ML	2015-10-16	797	4	0	0	1	0	0	0	0	0	0	0.88		0.04		2.8	1.03333
2	ML	2015-10-16	798	0	1	0	1	0	0	0	0	0	0	0.1		0.00454545		2.26667	-0.266667
2	ML	2015-10-16	799	1	0	0	0	0	1	0	0	0	0	0.26		0.0118182		2.86667	0.266667
2	ML	2015-10-16	260	0	1	0	0	0	0	0	0	0	0	0.66		0.03		5.06667	1.16667
3	ML	2015-11-04	791	2	0	0	0	0	0	0	0	0	1	1.34		0.0705263		3.6	-0.4
3	ML	2015-11-04	792	1	0	0	0	1	0	4	0	0	0	1.2		0.0631579		5.6	0.433333
3	ML	2015-11-04	793	1	0	0	0	0	1	0	0	0	0	0.39		0.0205263		3.16667	-0.933333
3	ML	2015-11-04	794	1	0	0	0	0	0	0	0	10	0	1.18		0.0621053		3.86667	-0.8
3	ML	2015-11-04	795	0	0	1	0	0	0	0	0	0	0	0.54		0.0284211		2.5	-0.533333
3	ML	2015-11-04	796	0	0	1	0	1	0	2	0	0	0	0.7		0.0368421		3.13333	0.333333
3	ML	2015-11-04	797	1	0	1	1	0	0	0	0	0	0	0.5		0.0263158		4.16667	1.36667
3	ML	2015-11-04	798	3	0	0	0	1	0	2	0	10	0	0.8		0.0421053		2.93333	0.666667
3	ML	2015-11-04	799	1	0	0	0	0	0	0	0	0	0	0.8		0.0421053		5.26667	2.4
3	ML	2015-11-04	260	0	1	0	0	0	0	0	0	0	0	1.54		0.0810526		5.33333	0.266667
4	ML	2015-11-19	791	0	0	1	0	1	0	0	0	0	0	0.08		0.00533333		3.9	0.3
4	ML	2015-11-19	792	2	1	0	0	0	0	14	0	1	0	-0.62		-0.0413333		5.06667	-0.533333
4	ML	2015-11-19	793	3	0	0	1	0	0	0	0	0	0	0.56		0.0373333		3.26667	0.1
4	ML	2015-11-19	794	3	0	0	0	0	1	0	0	0	0	0.26		0.0173333		3.6	-0.266667
4	ML	2015-11-19	795	0	0	0	0	0	0	3	0	0	1	0.76		0.0506667		2.4	-0.1
4	ML	2015-11-19	796	2	0	1	0	0	0	2	0	0	2	1.28		0.0853333		2.43333	-0.7
4	ML	2015-11-19	797	3	0	0	0	0	0	0	0	0	1	0.26		0.0173333		4	-0.166667
4	ML	2015-11-19	798	2	1	0	0	1	0	2	0	0	0	0.22		0.0146667		3.1	0.166667
4	ML	2015-11-19	799	1	0	0	0	0	0	0	0	0	0	0.24		0.016		5.43333	0.166667
4	ML	2015-11-19	260	0	1	0	0	0	0	0	0	0	0	0.04		0.00266667		5.26667	-0.0666667
5	ML	2015-12-08	791	0	0	1	0	0	0	2	0	0	1	0.68		0.0357895		4.93333	1.03333
5	ML	2015-12-08	792	3	0	0	0	0	0	3	0	1	1	0.5		0.0263158		5.13333	0.0666667
5	ML	2015-12-08	793	1	0	0	1	0	0	0	0	1	0	0.74		0.0389474		3.33333	0.0666667
5	ML	2015-12-08	794	4	0	0	0	0	0	2	0	0	0	0.26		0.0136842		4.03333	0.433333
5	ML	2015-12-08	795	0	0	0	0	1	0	2	1	0	0	-0.04		-0.00210526		4.06667	1.66667
5	ML	2015-12-08	796	2	0	0	0	0	0	0	0	0	2	-0.18		-0.00947368		3.16667	0.733333
5	ML	2015-12-08	797	2	0	0	0	0	0	0	0	0	0	0.24		0.0126316		3.93333	-0.0666667
5	ML	2015-12-08	798	2	0	0	0	0	0	3	0	0	1	0.3		0.0157895		3.83333	0.733333
5	ML	2015-12-08	799	1	0	0	0	0	0	0	0	0	0	0.28		0.0147368		5.16667	-0.266667
5	ML	2015-12-08	260	1	0	0	0	0	0	0	0	0	0	0.48		0.0252632		5.86667	0.6
6	ML	2016-02-29	791	2	0	0	0	0	0	0	0	0	1					4.9	-0.0333333
6	ML	2016-02-29	792	1	0	0	0	0	0	3	0	0	0					5.2	0.0666667
6	ML	2016-02-29	793	2	1	0	1	0	0	0	0	1	0					2.2	-1.13333
6	ML	2016-02-29	794	3	0	0	0	0	1	2	0	0	0					5.25	1.21667
6	ML	2016-02-29	795	1	0	0	0	0	0	0	0	0	1					3.9	-0.166667
6	ML	2016-02-29	796	2	1	0	0	0	0	3	0	0	1					2.35	-0.816667
6	ML	2016-02-29	797	1	0	0	0	0	0	2	0	0	0					4.2	0.266667
6	ML	2016-02-29	798	1	1	0	0	0	0	2	0	0	0					2.76667	-1.06667
6	ML	2016-02-29	799	1	0	0	0	0	0	1	0	0	0					3.5	-1.66667
6	ML	2016-02-29	260	0	0	0	0	0	0	0	0	0	0					5.5	-0.366667
7	ML	2016-03-16	791	0	0	0	0	0	0	2	0	0	1	5.36		0.0558333		4.5	-0.4
7	ML	2016-03-16	792	1	0	1	0	0	0	10	0	0	1	3.06		0.031875		4.56667	-0.633333
7	ML	2016-03-16	793	2	1	0	0	0	0	1	0	0	0	4		0.0416667		0.666667	-1.53333
7	ML	2016-03-16	794	4	0	0	0	1	1	0	0	0	1	3.52		0.0366667		4.5	-0.75
7	ML	2016-03-16	795	0	0	0	0	1	0	3	0	0	1	3.8		0.0395833		1.26667	-2.63333
7	ML	2016-03-16	796	4	0	0	0	0	0	2	0	0	1	1.34		0.0139583		1.66667	-0.683333
7	ML	2016-03-16	797	1	0	0	0	0	0	0	0	0	1	3.38		0.0352083		3.23333	-0.966667
7	ML	2016-03-16	798	2	2	0	0	0	0	0	0	0	0	3.16		0.0329167		3.83333	1.06667
7	ML	2016-03-16	799	1	0	0	0	0	0	0	0	0	0	3.16		0.0329167		4.83333	1.33333
7	ML	2016-03-16	260	1	0	0	0	2	0	0	0	0	0	2.3		0.0239583		5.66667	0.166667
8	ML	2016-04-26	791	0	0	2	0	0	0	0	0	0	0	-0.66		-0.0160976		4.25	-0.25
8	ML	2016-04-26	792	2	0	1	0	0	0	5	0	0	0	8.575		0.209146		6	1.43333
8	ML	2016-04-26	793	1	0	0	0	0	0	0	0	0	0	0.04		0.00097561		2	1.33333
8	ML	2016-04-26	794	2	0	0	0	1	0	4	0	0	0	1.38		0.0336585		6	1.5
8	ML	2016-04-26	795	0	0	0	0	1	0	3	0	0	1	3.475		0.0847561		3	1.73333
8	ML	2016-04-26	796	3	1	0	0	0	0	3	0	0	1	5.595		0.136463		1.35	-0.316667
8	ML	2016-04-26	797	1	2	0	0	0	0	0	0	0	2	0.7		0.0170732		3.25	0.0166667
8	ML	2016-04-26	798	2	0	0	0	0	0	0	0	0	0	2.07		0.0504878		4.23333	0.4
8	ML	2016-04-26	799	2	0	0	0	0	0	0	0	0	0	2.13		0.0519512		4	-0.833333
8	ML	2016-04-26	260	0	1	0	0	1	0	0	0	0	0	4.575		0.111585		5	-0.666667
9	ML	2016-06-08	791											5.633		0.131			0
9	ML	2016-06-08	792	3	1	0	0	0	0	1	0	0	0	-1.195		-0.0277907		6	0
9	ML	2016-06-08	793	1	0	1	0	0	0	0	0	0	1	0.82		0.0190698		2	0
9	ML	2016-06-08	794	4	0	0	0	1	0	3	0	0	0	5.4		0.125581		6.5	0.5
9	ML	2016-06-08	795	0	0	0	0	0	0	0	0	0	1	1.35		0.0313953		2.83333	-0.166667
9	ML	2016-06-08	796	2	0	0	0	1	0	3	0	0	0	2.025		0.047093		5.33333	3.98333
9	ML	2016-06-08	797	4	1	0	0	0	0	0	0	0	0	4.15		0.0965116			0
9	ML	2016-06-08	798	1	2	0	0	0	0	0	0	0	0	1.75		0.0406977		7	2.76667
9	ML	2016-06-08	799	2	0	0	0	0	2	0	0	0	0	3.77		0.0876744		5.5	1.5
9	ML	2016-06-08	260	0	0	0	0	1	0	0	0	0	0	-0.5		-0.0116279		5.25	0.25
10	ML	2016-07-21	791	0	2	0	0	0	0	3	0	0	0	2.367		0.0550465			0
10	ML	2016-07-21	792	1	0	0	0	0	0	2	0	0	0	1.225		0.0284884			0
10	ML	2016-07-21	793	2	0	0	0	0	0	3	0	0	1	0.425		0.00988372			0
10	ML	2016-07-21	794	3	0	0	0	0	0	5	0	0	0	1.2		0.027907			0
10	ML	2016-07-21	795	0	0	0	0	0	0	3	0	0	0	0.4		0.00930233			0
10	ML	2016-07-21	796	1	2	0	0	0	0	5	0	0	1	1.275		0.0296512			0
10	ML	2016-07-21	797	3	0	0	0	0	0	3	0	0	2	1.425		0.0331395			0
10	ML	2016-07-21	798	1	1	0	0	0	0	5	0	0	0	1		0.0232558			0
10	ML	2016-07-21	799	4	0	0	0	0	0	2	0	0	0	0.6		0.0139535			0
10	ML	2016-07-21	260	0	0	0	0	1	0	0	0	0	0	0.1		0.00232558			0
11	ML	2016-08-29	791	0	0	0	0	1	0	5	0	0	0	1.525		0.0391026			0
11	ML	2016-08-29	792																0
11	ML	2016-08-29	793	1	0	1	0	0	0	0	0	0	0	1.625		0.0416667			0
11	ML	2016-08-29	794	4	0	0	0	0	0	4	0	0	0	1.8		0.0461538			0
11	ML	2016-08-29	795	0	0	0	0	1	0	3	0	0	1	1.075		0.0275641			0
11	ML	2016-08-29	796	2	1	0	0	0	0	4	0	0	1	2.4		0.0615385			0
11	ML	2016-08-29	797	1	0	0	0	0	0	1	0	0	0	0.075		0.00192308			0
11	ML	2016-08-29	798	2	0	0	0	0	0	4	0	0	0	1.225		0.0314103			0
11	ML	2016-08-29	799	1	0	1	0	0	0	2	0	0	0	1.26		0.0323077			0
11	ML	2016-08-29	260	0	0	0	0	1	0	2	0	0	0	0.4		0.0102564			0
1	Mario	2015-09-23	983	4	1	0	0	0	0	1	0	5	0	0.94	0.46	0.0494737	0.0242105	7.23
1	Mario	2015-09-23	984	4	0	1	2	0	0	34	0	0	0	0.8	-0.04	0.0421053	-0.00210526	4.23
1	Mario	2015-09-23	985	4	1	0	0	0	0	13	0	0	0	1.08	0.52	0.0568421	0.0273684	4.07
1	Mario	2015-09-23	986	8	0	0	0	0	0	12	0	0	0	0.68	0.16	0.0357895	0.00842105	6.3
1	Mario	2015-09-23	987	1	0	0	0	0	0	2	0	0	0	0.8	-1.92	0.0421053	-0.101053	2.7
1	Mario	2015-09-23	988	1	0	1	0	0	0	2	0	0	0	0	0.36	0	0.0189474	3.53
1	Mario	2015-09-23	989	0	0	0	0	0	0	1	0	5	0	0.4	0.2	0.0210526	0.0105263	3.3
1	Mario	2015-09-23	990	0	0	0	0	0	3	0	0	0	0	0.24		0.0126316		2.27
2	Mario	2015-10-13	983	6	1	0	0	0	0	0	0	0	0	0.9	0.56	0.0428571	0.0266667	7.17	-0.06
2	Mario	2015-10-13	984	3	0	1	1	0	0	32	0	0	0	0.1	0.16	0.0047619	0.00761905	5.33	1.1
2	Mario	2015-10-13	985	3	0	0	0	0	0	15	0	0	0	0.64	0.04	0.0304762	0.00190476	4.13	0.06
2	Mario	2015-10-13	986	5	0	0	0	0	0	17	0	0	0	0.02	0.69	0.000952381	0.0328571	6.75	0.45
2	Mario	2015-10-13	987	1	0	0	0	0	0	3	1	0	0	0.82	0.04	0.0390476	0.00190476	2.63	-0.07
2	Mario	2015-10-13	988											1.56	-0.26	0.0742857	-0.012381		0
2	Mario	2015-10-13	989	0	0	0	0	0	0	1	0	0	0	1.02	0.08	0.0485714	0.00380952	2.87	-0.43
2	Mario	2015-10-13	990	0	0	0	0	0	4	0	0	0	0	0.66		0.0314286		2.17	-0.1
3	Mario	2015-11-04	983	2	1	0	0	0	0	2	0	15	0	0.8	0.38	0.0363636	0.0172727	6.27	-0.9
3	Mario	2015-11-04	984	1	0	0	1	0	0	25	0	0	0	1.36	1.24	0.0618182	0.0563636	5.63	0.3
3	Mario	2015-11-04	985	5	0	0	0	0	0	20	0	0	0	0.05	0.58	0.00227273	0.0263636	3.4	-0.73
3	Mario	2015-11-04	986	3	0	0	0	0	1	10	0	10	0	0.78	0.06	0.0354545	0.00272727	5.03	-1.72
3	Mario	2015-11-04	987	1	0	0	0	0	0	6	0	0	0	0.11	0.6	0.005	0.0272727	4.83	2.2
3	Mario	2015-11-04	988	0	0	0	0	0	0	4	0	0	0	-0.86	0.76	-0.0390909	0.0345455	3.93	0
3	Mario	2015-11-04	989	1	0	1	0	0	0	3	0	0	0	0.158	0.7	0.00718182	0.0318182	3.6	0.73
3	Mario	2015-11-04	990	0	1	0	0	0	0	0	0	0	0	0.64		0.0290909		1.93	-0.24
4	Mario	NA	983
4	Mario	NA	984
4	Mario	NA	985
4	Mario	NA	986
4	Mario	NA	987
4	Mario	NA	988
4	Mario	NA	989
4	Mario	NA	990
5	Mario	2015-12-10	983											1.08	-0.16	0.03	-0.00444444	6.66667	0.396667
5	Mario	2015-12-10	984	1	0	0	1	0	0	6	0	0	0	2.78	0.04	0.0772222	0.00111111	5.16667	-0.463333
5	Mario	2015-12-10	985	3	0	0	0	0	0	4	0	0	0	-0.06	0.28	-0.00166667	0.00777778	3.13333	-0.266667
5	Mario	2015-12-10	986	3	1	1	0	0	0	6	0	0	0	0.58	-0.18	0.0161111	-0.005	4.7	-0.33
5	Mario	2015-12-10	987	2	0	0	0	0	0	3	0	0	0	-0.4	0.4	-0.0111111	0.0111111	4.23333	-0.596667
5	Mario	2015-12-10	988											1.38	1.12	0.0383333	0.0311111	4.16667	0.236667
5	Mario	2015-12-10	989																-3.6
5	Mario	2015-12-10	990											1.34		0.0372222		1.9	-0.03
6	Mario	2016-02-16	983											0.26	0.2	0.00490566	0.00377358		0
6	Mario	2016-02-16	984	1	0	0	1	0	0	6	0	0	0	5.2	3.055	0.0981132	0.0576415	5.1	-0.0666667
6	Mario	2016-02-16	985	3	0	0	0	0	0	4	0	0	0	2.61	-0.56	0.0492453	-0.010566	4	0.866667
6	Mario	2016-02-16	986	3	1	1	0	0	0	6	0	0	0	3.165	0.66	0.059717	0.0124528	4.9	0.2
6	Mario	2016-02-16	987	2	0	0	0	0	0	3	0	0	0	0.93	0.905	0.0175472	0.0170755	5	0.766667
6	Mario	2016-02-16	988											2.9	3.02	0.054717	0.0569811		0
6	Mario	2016-02-16	989											1.702	2.83	0.0191236	0.0317978		0
6	Mario	2016-02-16	990																0
7	Mario	2016-03-17	983	3	0	0	0	0	0	2	0	0	1	4.625	2.46	0.105114	0.0559091	9	0
7	Mario	2016-03-17	984	2	0	0	1	0	0	8	0	0	0	2.9	0.25	0.0659091	0.00568182	2.67	-2.43
7	Mario	2016-03-17	985	6	0	0	0	0	0	4	0	0	0	0.875	0.72	0.0198864	0.0163636	5.17	1.17
7	Mario	2016-03-17	986	4	1	0	0	0	0	4	0	0	0	2.835	0.3	0.0644318	0.00681818	4	-0.9
7	Mario	2016-03-17	987																0
7	Mario	2016-03-17	988	1	0	0	0	3	0	0	0	0	0	4.955	4.725	0.112614	0.107386	7.33	0
7	Mario	2016-03-17	989	1	0	0	0	0	0	0	0	0	0	1.62	1.875	0.0368182	0.0426136	5.13	0
7	Mario	2016-03-17	990	1	0	0	0	1	0	0	0	0	0	0		0		1.83	0
8	Mario	2016-04-27	983	2	0	0	0	1	0	2	0	0	0	4.25	0.24	0.103659	0.00585366	6.25	-2.75
8	Mario	2016-04-27	984	4	0	0	1	0	0	4	0	0	1	-4.88	1.275	-0.119024	0.0310976	3.5	0.83
8	Mario	2016-04-27	985	5	0	0	0	0	0	5	0	0	0	-0.55	-2	-0.0134146	-0.0487805	4.33	-0.84
8	Mario	2016-04-27	986	3	0	0	0	0	0	9	0	0	0	1.9	0	0.0463415	0	6.25	2.25
8	Mario	2016-04-27	987	3	0	0	0	0	0	6	0	0	0	0	0	0	0	7	0
8	Mario	2016-04-27	988	1	0	0	0	1	0	0	0	0	1	-1.195	-0.085	-0.0291463	-0.00207317		-7.33
8	Mario	2016-04-27	989	0	0	0	0	1	0	0	0	0	0	2.18	3.908	0.0531707	0.0953171	6	0.87
8	Mario	2016-04-27	990	0	1	0	0	0	0	5	0	0	0	1.3		0.0317073		2	0.17
9	Mario	2016-06-09	983	2	0	0	0	0	0	3	0	0	0	0.2	3.74	0.00454545	0.085		0
9	Mario	2016-06-09	984	3	0	0	1	0	0	14	0	0	0	-4.04	-3.95	-0.0918182	-0.0897727		0
9	Mario	2016-06-09	985											4	0.8	0.0909091	0.0181818		0
9	Mario	2016-06-09	986	3	0	0	0	0	0	14	0	0	0	6.3	1.253	0.0741176	0.0284773		0
9	Mario	2016-06-09	987	2	0	0	0	0	0	3	0	0	0	7.62	0.75	0.0896471	0.0170455		0
9	Mario	2016-06-09	988	0	0	0	0	2	0	0	0	0	0	-0.58	0.835	-0.0131818	0.0189773		0
9	Mario	2016-06-09	989	0	0	0	0	1	0	0	0	0	0	4.513	2.8	0.102568	0.0636364		0
9	Mario	2016-06-09	990	3	0	0	0	0	0	10	0	0	0	0		0			0
10	Mario	2016-07-21	983	3	0	0	0	0	0	3	0	0	0	0	0	0	0	5.5	0
10	Mario	2016-07-21	984	3	0	0	2	0	0	12	0	0	0	1.35	0.15	0.0313953	0.00348837	6.5	0
10	Mario	2016-07-21	985	6	0	0	0	0	0	9	0	0	0	0.825	0.66	0.019186	0.0153488	9	0
10	Mario	2016-07-21	986	4	0	0	0	0	0	9	0	0	0	2.48	0.43	0.0576744	0.01	9	0
10	Mario	2016-07-21	987	3	0	0	0	0	0	2	0	0	0	1.4	0.8	0.0325581	0.0186047	5.5	0
10	Mario	2016-07-21	988	1	1	0	0	0	0	0	0	0	0	2.6	2.575	0.0604651	0.0598837		0
10	Mario	2016-07-21	989											1.467	0.5336	0.0341163	0.0124093		0
10	Mario	2016-07-21	990	0	2	0	1	0	0	0	0	0	0	0		0		6	0
11	Mario	2016-08-29	983	3	0	0	0	0	0	0	0	0	0	0.175	0.12	0.00448718	0.00307692		0
11	Mario	2016-08-29	984	2	0	0	2	0	0	7	0	0	0	2.75	0.55	0.0705128	0.0141026	11	4.5
11	Mario	2016-08-29	985											0	0	0	0		0
11	Mario	2016-08-29	986	5	0	0	0	0	0	11	0	0	0	4.135	0.833	0.106026	0.021359	4.66667	-4.33333
11	Mario	2016-08-29	987	3	0	0	0	0	0	5	0	0	0	3.1	1.33	0.0794872	0.0341026	9.5	4
11	Mario	2016-08-29	988	1	2	0	0	0	0	2	0	0	0	1.858	1.325	0.047641	0.0339744	4	0
11	Mario	2016-08-29	989	1	0	0	0	0	0	0	0	0	0	0	1.967	0	0.0504359		0
11	Mario	2016-08-29	990	0	0	0	0	1	0	5	0	0	0	0.7	0.5336	0.0179487	0.0124093		0
				square root transformed
				Bray-Curtis because missing values then centroids
				nMDS
				PCO
				shows temperal changes in all sites
				w/ original data set- select all, analyze diverse with abundance and number species- check results to worksheet	also-transform to prensence absence data
					average sampling sites
					sum sampling sites to get total number species per plot per site
					then overlay average values per site with fish abundances
					.5 correlation
					do correlation with linear extension and 3 species princess parrot, red urchin and longfin damsel
					clumped yes or no if species effect corals
					species average abundance on the Y`and date on the X axis over all 10 plots per site using sedentary species
					scatter plot with damsel on X and coral cover on Y
					red urchin on X axis and 3spot and longfin on Y correlation scatterplot
					organize algae data into new workbook and send
					urchin, 3spot, longfin, squirrel and french grunt
					total number species and total abundance per site per sampling time

## Sheet: Mortatlity
A.cervicornis	predation	disease	total	A prolifera	predation	disease	total
SCRI	10	32	42	SCRI	10	20	30
MAR	22	24	46	MAR	28	3	31
MLU	10	40	50	MLU
