# Supplementary material for: Growth dynamics in Acropora cervicornis and A. prolifera in southwest Puerto Rico
Source: PeerJ journal article supplement (doi:10.7717/peerj.8435), 2020-02-11
Supplement: peerj-39561-Weil_et_al._Suplem.Fig-1.pdf [file peerj-39561-Weil_et_al._Suplem.Fig-1.pdf]

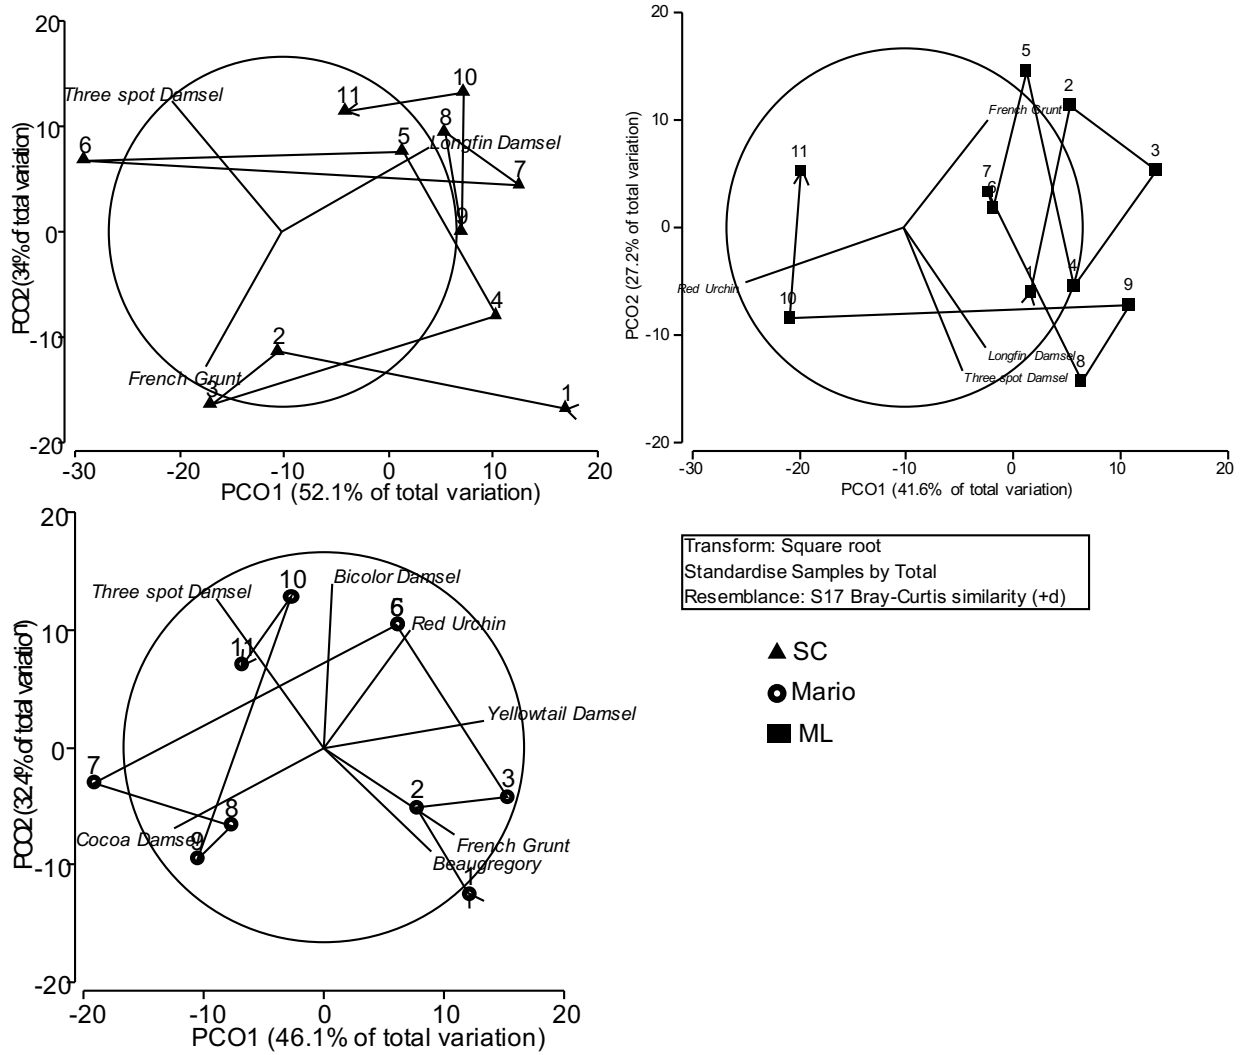

**Suppl. Fig. 1.** Principal coordinate ordination plots (PCO) showing sampling time in three different locations. Vectors indicate species that were correlated ( $> 0.7$ ) with either of the two first axis of ordinations. Continued arrows indicate temporal changes.
